# Supplementary material for: Geotechnical Characteristic Assessments of Floodplain Soils Using SCPTU Data in Nanjing, China
Source: Hindawi journal article supplement (doi:10.1155/2022/1669511), 2022-01-01
Supplement: f1 [file 1669511.f1.txt]

Qt	Depth	Qt	Depth	Qt	Depth	Qt	Depth	Qt	Depth	Qt	Depth	Qt	Depth	Depth	8Qt	Qt	Depth	Qt	Depth	Qt	Depth	Qt	Depth	Qt	Depth	Qt	Depth
MPA	(m)	MPA	(m)	MPA	(m)	MPA	(m)	MPA	(m)	MPA	(m)	MPA	(m)	(m)	MPA	qt	Depth	qt	Depth	qt	Depth	qt	Depth	qt	Depth	qt	Depth
--		--		--		--		--		--		--			--	1.62	0.05	2.12	0.05	1.18	0.05	0.5	0.05	1.78	0.05	1.01	0.05
1.37	0.05	1.05	0.05	2.09	0.05	1.3	0.05	0.91	0.05	0.95	0.05	0	0.05	0.05	0	1.75	0.1	2.66	0.1	1.41	0.1	1.68	0.1	1.02	0.1	1.19	0.1
1.14	0.1	2.03	0.1	2.1	0.1	2.47	0.1	2.17	0.1	1.38	0.1	0	0.1	0.1	0	1.62	0.15	2.35	0.15	1.39	0.15	1.39	0.15	1.77	0.15	1.19	0.15
0.69	0.15	1.98	0.15	1.76	0.15	2.28	0.15	1.57	0.15	1.38	0.15	0	0.15	0.15	0	1.54	0.2	2.32	0.2	0.19	0.2	1.77	0.2	1.56	0.2	1.11	0.2
1.01	0.2	2.44	0.2	1.87	0.2	2.23	0.2	0.94	0.2	1.27	0.2	0	0.2	0.2	0	1.55	0.25	2.27	0.25	0.18	0.25	1.65	0.25	1.54	0.25	0.16	0.25
1.66	0.25	1.93	0.25	1.23	0.25	1.81	0.25	1.33	0.25	1.39	0.25	0	0.25	0.25	0.01	1.71	0.3	2.4	0.3	0.15	0.3	1.73	0.3	1.51	0.3	0.14	0.3
1.82	0.3	1.24	0.3	0.82	0.3	1.44	0.3	2.12	0.3	1.91	0.3	0	0.3	0.3	0.25	1.61	0.35	3.58	0.35	0.12	0.35	1.91	0.35	0.39	0.35	0.99	0.35
1.42	0.35	1.06	0.35	0.63	0.35	1.19	0.35	2.47	0.35	1.52	0.35	0	0.35	0.35	1.75	1.43	0.4	3.61	0.4	0.11	0.4	2.16	0.4	0.13	0.4	0.97	0.4
1.37	0.4	1.34	0.4	0.59	0.4	1.54	0.4	2.89	0.4	1.22	0.4	1.78	0.4	0.4	2.14	1.36	0.45	3.66	0.45	1.79	0.45	2.19	0.45	0.15	0.45	1.11	0.45
1.02	0.45	1.05	0.45	0.66	0.45	1.7	0.45	3.97	0.45	0.9	0.45	1.98	0.45	0.45	1.61	1.24	0.5	3.1	0.5	1.94	0.5	2.66	0.5	0.15	0.5	2.44	0.5
2.23	0.5	0.74	0.5	0.32	0.5	2.03	0.5	2.83	0.5	0.7	0.5	1.73	0.5	0.5	1.25	1.01	0.55	2.68	0.55	2.37	0.55	2.89	0.55	0.16	0.55	2.68	0.55
1.53	0.55	0.49	0.55	0.24	0.55	2.05	0.55	1.88	0.55	0.54	0.55	1.44	0.55	0.55	1.01	0.93	0.6	2.62	0.6	2.89	0.6	2.95	0.6	0.14	0.6	2.73	0.6
1.51	0.6	0.39	0.6	0.5	0.6	1.88	0.6	1.4	0.6	0.47	0.6	1.47	0.6	0.6	0.9	0.65	0.65	2.17	0.65	2.38	0.65	2.67	0.65	2.19	0.65	2.59	0.65
1.47	0.65	0.41	0.65	0.49	0.65	1.1	0.65	1.34	0.65	0.47	0.65	1.47	0.65	0.65	0.73	0.93	0.7	1.8	0.7	1.77	0.7	2.11	0.7	2.56	0.7	1.86	0.7
2.4	0.7	0.73	0.7	0.52	0.7	0.79	0.7	1.32	0.7	0.56	0.7	2.19	0.7	0.7	0.7	0.82	0.75	1.54	0.75	1.6	0.75	1.88	0.75	2.71	0.75	1.3	0.75
1.08	0.75	1.17	0.75	0.45	0.75	0.63	0.75	1.24	0.75	0.93	0.75	2.27	0.75	0.75	0.66	1.37	0.8	0.88	0.8	1.47	0.8	1.89	0.8	2.65	0.8	1.23	0.8
1.32	0.8	1	0.8	0.4	0.8	0.88	0.8	1.08	0.8	1.2	0.8	1.33	0.8	0.8	0.77	1.75	0.85	1.27	0.85	1.33	0.85	1.33	0.85	2.37	0.85	1.22	0.85
1.3	0.85	0.82	0.85	0.44	0.85	1.22	0.85	0.92	0.85	1.49	0.85	1.01	0.85	0.85	0.83	1.55	0.9	1.11	0.9	1.17	0.9	1.18	0.9	1.82	0.9	1.23	0.9
1.18	0.9	0.62	0.9	0.73	0.9	1.36	0.9	0.77	0.9	1.44	0.9	0.74	0.9	0.9	0.86	1.91	0.95	1.18	0.95	1.13	0.95	0.92	0.95	1.09	0.95	0.78	0.95
1.31	0.95	0.66	0.95	0.93	0.95	1.4	0.95	0.86	0.95	1.45	0.95	0.47	0.95	0.95	1.01	2.33	1	1.1	1	1.1	1	0.8	1	0.78	1	0.69	1
1.43	1	0.91	1	0.93	1	1.37	1	0.94	1	1.24	1	0.34	1	1	1.18	2.21	1.05	1.29	1.05	1.23	1.05	0.8	1.05	0.91	1.05	0.96	1.05
1.47	1.05	1.08	1.05	0.96	1.05	1.56	1.05	0.9	1.05	0.97	1.05	0.4	1.05	1.05	1.05	1.66	1.1	1.6	1.1	1.7	1.1	1.9	1.1	1.4	1.1	0.79	1.1
1.53	1.1	0.96	1.1	0.92	1.1	1.47	1.1	0.81	1.1	0.85	1.1	0.64	1.1	1.1	0.83	0.95	1.15	2.29	1.15	1.89	1.15	2.29	1.15	1.26	1.15	0.57	1.15
1.46	1.15	0.96	1.15	1	1.15	1.47	1.15	0.81	1.15	0.84	1.15	0.88	1.15	1.15	0.72	0.73	1.2	2.25	1.2	1.93	1.2	2.36	1.2	1.36	1.2	0.32	1.2
1.19	1.2	1.06	1.2	0.97	1.2	1.26	1.2	0.81	1.2	0.96	1.2	0.76	1.2	1.2	0.76	0.82	1.25	1.45	1.25	2.09	1.25	2.13	1.25	0.89	1.25	0.4	1.25
0.95	1.25	0.92	1.25	0.94	1.25	1.16	1.25	0.97	1.25	1.03	1.25	0.76	1.25	1.25	0.89	1.49	1.3	1.11	1.3	2.4	1.3	1.63	1.3	0.56	1.3	1	1.3
0.93	1.3	0.9	1.3	0.82	1.3	1.15	1.3	1	1.3	1	1.3	0.86	1.3	1.3	1.03	1.94	1.35	0.92	1.35	2.28	1.35	1.02	1.35	0.35	1.35	2.22	1.35
1.08	1.35	0.91	1.35	0.72	1.35	1.17	1.35	0.96	1.35	0.92	1.35	0.83	1.35	1.35	0.99	1.77	1.4	0.72	1.4	1.63	1.4	0.55	1.4	1.35	1.4	2.52	1.4
0.99	1.4	1	1.4	0.64	1.4	1.11	1.4	0.95	1.4	0.88	1.4	0.83	1.4	1.4	0.98	0.9	1.45	1.24	1.45	1.06	1.45	0.5	1.45	1.39	1.45	2.35	1.45
0.92	1.45	0.94	1.45	0.58	1.45	1.08	1.45	0.92	1.45	0.87	1.45	0.87	1.45	1.45	1.08	0.67	1.5	2.13	1.5	0.83	1.5	0.47	1.5	1.04	1.5	1.64	1.5
0.92	1.5	0.9	1.5	0.55	1.5	1.04	1.5	0.83	1.5	0.91	1.5	0.9	1.5	1.5	1.08	0.52	1.55	2.16	1.55	0.79	1.55	1.15	1.55	0.56	1.55	0.33	1.55
0.87	1.55	0.85	1.55	0.69	1.55	0.91	1.55	0.63	1.55	0.86	1.55	0.91	1.55	1.55	1.04	0.47	1.6	1.89	1.6	1.25	1.6	2.07	1.6	0.27	1.6	0.84	1.6
0.79	1.6	0.77	1.6	0.64	1.6	0.89	1.6	0.55	1.6	0.82	1.6	0.93	1.6	1.6	0.99	0.4	1.65	1.16	1.65	1.88	1.65	2.03	1.65	0.3	1.65	0.9	1.65
0.8	1.65	0.73	1.65	0.64	1.65	0.93	1.65	0.53	1.65	0.84	1.65	0.92	1.65	1.65	0.95	0.38	1.7	0.84	1.7	2.24	1.7	1.72	1.7	0.37	1.7	0.76	1.7
0.81	1.7	0.71	1.7	0.71	1.7	0.85	1.7	0.52	1.7	0.79	1.7	0.9	1.7	1.7	0.91	0.38	1.75	0.58	1.75	1.94	1.75	1.45	1.75	0.29	1.75	0.6	1.75
0.77	1.75	0.71	1.75	0.66	1.75	0.83	1.75	0.52	1.75	0.69	1.75	1.01	1.75	1.75	0.81	0.39	1.8	0.6	1.8	1.3	1.8	-0.03	1.8	1.76	1.8	1.67	1.8
0.75	1.8	0.59	1.8	0.64	1.8	0.75	1.8	0.48	1.8	0.78	1.8	1.16	1.8	1.8	0.75	0.6	1.85	0.55	1.85	0.95	1.85	1.35	1.85	2.75	1.85	1.16	1.85
0.72	1.85	0.56	1.85	0.64	1.85	0.74	1.85	0.53	1.85	0.76	1.85	1.03	1.85	1.85	0.79	0.43	1.9	0.51	1.9	0.51	1.9	0.7	1.9	3.55	1.9	0.62	1.9
0.58	1.9	0.61	1.9	0.56	1.9	0.79	1.9	0.53	1.9	0.79	1.9	0.84	1.9	1.9	0.8	0.28	1.95	0.57	1.95	0.02	1.95	0.55	1.95	3.04	1.95	0.5	1.95
0.55	1.95	0.59	1.95	0.49	1.95	0.8	1.95	0.51	1.95	0.71	1.95	0.71	1.95	1.95	0.72	0.24	2	0.52	2	0.44	2	0.42	2	2.67	2	0.37	2
0.69	2	0.63	2	0.49	2	0.81	2	0.51	2	0.65	2	0.61	2	2	0.71	0.39	2.05	0.33	2.05	0.38	2.05	0.37	2.05	0.3	2.05	0.49	2.05
0.66	2.05	0.67	2.05	0.47	2.05	0.9	2.05	0.55	2.05	0.84	2.05	0.62	2.05	2.05	0.74	0.35	2.1	0.45	2.1	0.26	2.1	0.35	2.1	2.49	2.1	0.4	2.1
0.83	2.1	0.66	2.1	0.41	2.1	0.77	2.1	0.53	2.1	0.63	2.1	0.54	2.1	2.1	0.68	0.28	2.15	0.44	2.15	0.19	2.15	0.32	2.15	2	2.15	0.56	2.15
0.72	2.15	0.68	2.15	0.42	2.15	0.74	2.15	0.54	2.15	0.59	2.15	0.54	2.15	2.15	0.71	0.3	2.2	0.56	2.2	0.3	2.2	0.26	2.2	1.28	2.2	0.37	2.2
0.68	2.2	0.57	2.2	0.41	2.2	0.72	2.2	0.51	2.2	0.6	2.2	0.56	2.2	2.2	0.67	0.27	2.25	0.59	2.25	0.4	2.25	0.27	2.25	1.13	2.25	0.31	2.25
0.72	2.25	0.5	2.25	0.43	2.25	0.76	2.25	0.47	2.25	0.53	2.25	0.48	2.25	2.25	0.61	0.24	2.3	0.49	2.3	0.3	2.3	0.23	2.3	1.65	2.3	0.41	2.3
0.68	2.3	0.43	2.3	0.44	2.3	0.81	2.3	0.45	2.3	0.47	2.3	0.47	2.3	2.3	0.59	0.27	2.35	0.44	2.35	0.24	2.35	0.21	2.35	1.89	2.35	0.26	2.35
0.69	2.35	0.42	2.35	0.46	2.35	0.84	2.35	0.45	2.35	0.48	2.35	0.52	2.35	2.35	0.56	1.06	2.4	0.37	2.4	0.26	2.4	0.18	2.4	1.36	2.4	0.37	2.4
0.52	2.4	0.44	2.4	0.45	2.4	0.76	2.4	0.47	2.4	0.48	2.4	0.52	2.4	2.4	0.55	1.88	2.45	0.41	2.45	0.25	2.45	0.22	2.45	1.08	2.45	0.23	2.45
0.55	2.45	0.4	2.45	0.43	2.45	0.7	2.45	0.46	2.45	0.45	2.45	0.44	2.45	2.45	0.53	2.9	2.5	0.43	2.5	0.19	2.5	0.32	2.5	0.84	2.5	0.24	2.5
0.5	2.5	0.38	2.5	0.39	2.5	0.66	2.5	0.45	2.5	0.42	2.5	0.44	2.5	2.5	0.52	2.76	2.55	0.38	2.55	0.22	2.55	0.33	2.55	0.48	2.55	0.48	2.55
0.52	2.55	0.32	2.55	0.38	2.55	0.65	2.55	0.44	2.55	0.4	2.55	0.49	2.55	2.55	0.51	2.41	2.6	0.36	2.6	0.21	2.6	0.31	2.6	0.42	2.6	0.46	2.6
0.55	2.6	0.31	2.6	0.34	2.6	0.6	2.6	0.4	2.6	0.37	2.6	0.45	2.6	2.6	0.5	2.15	2.65	0.32	2.65	0.17	2.65	0.18	2.65	0.53	2.65	0.57	2.65
0.49	2.65	0.32	2.65	0.32	2.65	0.58	2.65	0.37	2.65	0.37	2.65	0.42	2.65	2.65	0.49	3.22	2.7	0.32	2.7	0.13	2.7	0.23	2.7	0.62	2.7	0.41	2.7
0.41	2.7	0.36	2.7	0.32	2.7	0.61	2.7	0.37	2.7	0.37	2.7	0.41	2.7	2.7	0.48	4.31	2.75	0.33	2.75	0.19	2.75	0.31	2.75	0.47	2.75	0.31	2.75
0.4	2.75	0.33	2.75	0.37	2.75	0.61	2.75	0.37	2.75	0.35	2.75	0.41	2.75	2.75	0.45	4.74	2.8	0.4	2.8	0.88	2.8	0.29	2.8	0.58	2.8	0.22	2.8
0.39	2.8	0.31	2.8	0.45	2.8	0.59	2.8	0.39	2.8	0.35	2.8	0.44	2.8	2.8	0.43	5.11	2.85	0.77	2.85	2.37	2.85	0.24	2.85	0.54	2.85	0.31	2.85
0.39	2.85	0.31	2.85	0.35	2.85	0.55	2.85	0.37	2.85	0.34	2.85	0.43	2.85	2.85	0.43	5.23	2.9	0.82	2.9	2.99	2.9	0.26	2.9	0.43	2.9	0.41	2.9
0.35	2.9	0.36	2.9	0.23	2.9	0.59	2.9	0.32	2.9	0.32	2.9	0.43	2.9	2.9	0.43	4.99	2.95	1.19	2.95	2.96	2.95	0.17	2.95	0.39	2.95	0.31	2.95
0.33	2.95	0.33	2.95	0.23	2.95	0.54	2.95	0.29	2.95	0.28	2.95	0.39	2.95	2.95	0.39	4.51	3	1.55	3	2.61	3	0.18	3	0.4	3	0.32	3
0.34	3	0.26	3	0.21	3	0.5	3	0.28	3	0.26	3	0.36	3	3	0.38	3.99	3.05	1.95	3.05	2.27	3.05	0.3	3.05	0.3	3.05	0.32	3.05
0.5	3.05	0.38	3.05	0.25	3.05	0.63	3.05	0.27	3.05	0.28	3.05	0.29	3.05	3.05	0.37	4.02	3.1	2.09	3.1	3.28	3.1	0.23	3.1	0.21	3.1	0.3	3.1
0.39	3.1	0.32	3.1	0.32	3.1	0.55	3.1	0.46	3.1	0.24	3.1	0.39	3.1	3.1	0.35	3.63	3.15	1.76	3.15	3.82	3.15	0.33	3.15	0.32	3.15	0.49	3.15
0.4	3.15	0.31	3.15	0.3	3.15	0.55	3.15	0.43	3.15	0.24	3.15	0.37	3.15	3.15	0.34	3.23	3.2	3	3.2	4.26	3.2	1.39	3.2	0.29	3.2	0.34	3.2
0.37	3.2	0.31	3.2	0.27	3.2	0.56	3.2	0.38	3.2	0.29	3.2	0.35	3.2	3.2	0.34	2.92	3.25	4.01	3.25	4.79	3.25	1.7	3.25	0.32	3.25	0.53	3.25
0.33	3.25	0.36	3.25	0.26	3.25	0.57	3.25	0.32	3.25	0.3	3.25	0.35	3.25	3.25	0.31	2.64	3.3	4.07	3.3	4.84	3.3	1.32	3.3	0.47	3.3	2.6	3.3
0.32	3.3	0.36	3.3	0.27	3.3	0.55	3.3	0.36	3.3	0.21	3.3	0.32	3.3	3.3	0.3	2.58	3.35	4.57	3.35	4.33	3.35	1.17	3.35	1	3.35	2.96	3.35
0.36	3.35	0.3	3.35	0.27	3.35	0.5	3.35	0.48	3.35	0.21	3.35	0.41	3.35	3.35	0.5	2.65	3.4	5.35	3.4	3.8	3.4	1.37	3.4	0.62	3.4	2.96	3.4
0.36	3.4	0.29	3.4	0.27	3.4	0.51	3.4	0.37	3.4	0.24	3.4	0.32	3.4	3.4	0.33	2.72	3.45	5.75	3.45	3.43	3.45	0.84	3.45	0.38	3.45	2.69	3.45
0.3	3.45	0.31	3.45	0.23	3.45	0.49	3.45	0.4	3.45	0.21	3.45	0.33	3.45	3.45	0.29	2.67	3.5	5.39	3.5	3.16	3.5	0.97	3.5	0.51	3.5	2.33	3.5
0.31	3.5	0.31	3.5	0.19	3.5	0.5	3.5	0.35	3.5	0.25	3.5	0.31	3.5	3.5	0.26	2.63	3.55	4.69	3.55	2.96	3.55	1.19	3.55	0.54	3.55	2.05	3.55
0.32	3.55	0.27	3.55	0.24	3.55	0.47	3.55	0.34	3.55	0.21	3.55	0.29	3.55	3.55	0.38	2.51	3.6	4.1	3.6	2.85	3.6	0.88	3.6	0.75	3.6	1.56	3.6
0.32	3.6	0.3	3.6	0.29	3.6	0.48	3.6	0.33	3.6	0.21	3.6	0.31	3.6	3.6	0.37	1.95	3.65	3.76	3.65	2.91	3.65	2.93	3.65	0.64	3.65	1.06	3.65
0.3	3.65	0.29	3.65	0.26	3.65	0.5	3.65	0.31	3.65	0.22	3.65	0.3	3.65	3.65	0.33	0.87	3.7	3.47	3.7	2.95	3.7	3.67	3.7	0.65	3.7	0.5	3.7
0.33	3.7	0.28	3.7	0.24	3.7	0.61	3.7	0.32	3.7	0.32	3.7	0.32	3.7	3.7	0.3	0.58	3.75	3.37	3.75	2.92	3.75	3.63	3.75	1.11	3.75	0.33	3.75
0.28	3.75	0.29	3.75	0.33	3.75	0.51	3.75	0.35	3.75	0.34	3.75	0.29	3.75	3.75	0.32	0.88	3.8	3.3	3.8	2.37	3.8	4.03	3.8	1.68	3.8	0.32	3.8
0.3	3.8	0.26	3.8	0.3	3.8	0.49	3.8	0.41	3.8	0.23	3.8	0.27	3.8	3.8	0.31	1.58	3.85	3.26	3.85	2.95	3.85	4.54	3.85	2.46	3.85	2.45	3.85
0.34	3.85	0.35	3.85	0.3	3.85	0.45	3.85	0.37	3.85	0.21	3.85	0.26	3.85	3.85	0.33	1.59	3.9	3.25	3.9	2.92	3.9	4.95	3.9	1.91	3.9	3.35	3.9
0.35	3.9	0.3	3.9	0.27	3.9	0.45	3.9	0.33	3.9	0.2	3.9	0.27	3.9	3.9	0.3	2.31	3.95	3.16	3.95	2.95	3.95	4.78	3.95	1.03	3.95	3.28	3.95
0.48	3.95	0.34	3.95	0.25	3.95	0.45	3.95	0.32	3.95	0.23	3.95	0.29	3.95	3.95	0.3	2.7	4	2.64	4	2.79	4	4.35	4	1.66	4	2.84	4
0.29	4	0.3	4	0.26	4	0.45	4	0.33	4	0.29	4	0.41	4	4	0.15	2.91	4.05	1.31	4.05	2.41	4.05	3.9	4.05	2.44	4.05	2.49	4.05
0.35	4.05	0.37	4.05	0.25	4.05	0.5	4.05	0.34	4.05	0.26	4.05	0.26	4.05	4.05	0.3	3.28	4.1	0.77	4.1	1.33	4.1	3.83	4.1	2.98	4.1	1.65	4.1
0.3	4.1	0.3	4.1	0.25	4.1	0.48	4.1	0.33	4.1	0.24	4.1	0.25	4.1	4.1	0.31	3	4.15	0.58	4.15	0.67	4.15	3.64	4.15	3.16	4.15	2.74	4.15
0.29	4.15	0.28	4.15	0.27	4.15	0.45	4.15	0.35	4.15	0.26	4.15	0.27	4.15	4.15	0.31	2.51	4.2	0.96	4.2	0.53	4.2	3.45	4.2	3.17	4.2	3.93	4.2
0.32	4.2	0.29	4.2	0.24	4.2	0.46	4.2	0.33	4.2	0.25	4.2	0.27	4.2	4.2	0.3	2.03	4.25	3.42	4.25	1.76	4.25	3.27	4.25	2.93	4.25	4.22	4.25
0.34	4.25	0.29	4.25	0.24	4.25	0.47	4.25	0.31	4.25	0.25	4.25	0.25	4.25	4.25	0.34	1.64	4.3	3.44	4.3	1.26	4.3	3.14	4.3	2.77	4.3	4.48	4.3
0.26	4.3	0.38	4.3	0.25	4.3	0.47	4.3	0.32	4.3	0.25	4.3	0.27	4.3	4.3	0.32	0.99	4.35	2.6	4.35	1.65	4.35	2.96	4.35	2.82	4.35	4.43	4.35
0.24	4.35	0.26	4.35	0.43	4.35	0.46	4.35	0.33	4.35	0.25	4.35	0.25	4.35	4.35	0.3	0.74	4.4	1.52	4.4	2.52	4.4	2.41	4.4	2.38	4.4	4.32	4.4
0.27	4.4	0.32	4.4	0.4	4.4	0.45	4.4	0.29	4.4	0.26	4.4	0.25	4.4	4.4	0.31	0.62	4.45	1.07	4.45	2.68	4.45	1.27	4.45	1.99	4.45	4.15	4.45
0.29	4.45	0.79	4.45	0.3	4.45	0.47	4.45	0.31	4.45	0.25	4.45	0.3	4.45	4.45	0.3	0.79	4.5	1.31	4.5	2.83	4.5	0.46	4.5	2.42	4.5	3.99	4.5
0.29	4.5	0.34	4.5	0.67	4.5	0.51	4.5	0.32	4.5	0.26	4.5	0.3	4.5	4.5	0.3	0.64	4.55	2.88	4.55	2.48	4.55	0.29	4.55	3.67	4.55	3.84	4.55
0.29	4.55	0.39	4.55	0.36	4.55	0.51	4.55	0.33	4.55	0.25	4.55	0.27	4.55	4.55	0.3	2.39	4.6	2.95	4.6	1.88	4.6	0.24	4.6	4.61	4.6	3.78	4.6
0.28	4.6	0.47	4.6	0.26	4.6	0.48	4.6	0.38	4.6	0.24	4.6	0.26	4.6	4.6	0.3	3.07	4.65	2.94	4.65	1.3	4.65	0.34	4.65	4.13	4.65	3.77	4.65
0.29	4.65	0.31	4.65	0.19	4.65	0.48	4.65	0.33	4.65	0.24	4.65	0.28	4.65	4.65	0.4	3.16	4.7	2.63	4.7	0.86	4.7	2.12	4.7	3.86	4.7	3.77	4.7
0.28	4.7	0.31	4.7	0.27	4.7	0.45	4.7	0.83	4.7	0.24	4.7	0.26	4.7	4.7	0.27	2.81	4.75	1.68	4.75	0.55	4.75	3.64	4.75	3.71	4.75	3.77	4.75
0.29	4.75	0.33	4.75	0.27	4.75	0.45	4.75	0.48	4.75	0.24	4.75	0.26	4.75	4.75	0.31	2.37	4.8	0.99	4.8	0.36	4.8	3.88	4.8	2.78	4.8	3.81	4.8
0.3	4.8	0.31	4.8	0.33	4.8	0.47	4.8	0.32	4.8	0.26	4.8	0.24	4.8	4.8	0.56	2.09	4.85	0.68	4.85	0.54	4.85	4.02	4.85	1.69	4.85	3.54	4.85
0.28	4.85	0.35	4.85	0.26	4.85	0.49	4.85	0.33	4.85	0.29	4.85	0.22	4.85	4.85	0.43	1.88	4.9	1.46	4.9	1.22	4.9	3.72	4.9	1.25	4.9	3.7	4.9
0.29	4.9	0.37	4.9	0.28	4.9	0.57	4.9	0.32	4.9	0.26	4.9	0.23	4.9	4.9	0.37	1.5	4.95	1.11	4.95	1.52	4.95	3.22	4.95	2.54	4.95	3.65	4.95
0.28	4.95	0.34	4.95	0.31	4.95	0.49	4.95	0.32	4.95	0.27	4.95	0.26	4.95	4.95	0.92	1.25	5	0.62	5	2.45	5	2.8	5	3.67	5	3.53	5
0.29	5	0.31	5	0.36	5	0.47	5	0.33	5	0.36	5	0.28	5	5	0.49	1.11	5.05	0.44	5.05	2.15	5.05	3.66	5.05	3.54	5.05	3.29	5.05
0.38	5.05	0.37	5.05	0.37	5.05	0.51	5.05	0.33	5.05	0.37	5.05	0.27	5.05	5.05	0.33	0.79	5.1	0.48	5.1	2.2	5.1	5.44	5.1	3.59	5.1	2.68	5.1
0.55	5.1	0.33	5.1	0.31	5.1	0.71	5.1	0.32	5.1	0.32	5.1	0.51	5.1	5.1	0.3	1.59	5.15	1.42	5.15	2.1	5.15	6.57	5.15	3.73	5.15	1.24	5.15
0.35	5.15	0.36	5.15	0.3	5.15	0.78	5.15	0.34	5.15	0.31	5.15	0.45	5.15	5.15	0.3	1.65	5.2	2.24	5.2	1.96	5.2	3.38	5.2	3.93	5.2	0.61	5.2
0.34	5.2	0.36	5.2	0.35	5.2	0.55	5.2	0.34	5.2	0.34	5.2	0.29	5.2	5.2	0.34	1.27	5.25	2.44	5.25	1.88	5.25	1.75	5.25	4.1	5.25	0.43	5.25
0.65	5.25	0.35	5.25	0.32	5.25	0.5	5.25	0.33	5.25	0.32	5.25	0.2	5.25	5.25	0.41	1.91	5.3	2.14	5.3	1.76	5.3	1.99	5.3	4.16	5.3	0.42	5.3
0.54	5.3	0.42	5.3	0.3	5.3	0.49	5.3	0.34	5.3	0.31	5.3	0.19	5.3	5.3	0.5	1.91	5.35	2.6	5.35	1.26	5.35	2.8	5.35	4.13	5.35	0.47	5.35
0.36	5.35	0.37	5.35	0.35	5.35	0.5	5.35	0.38	5.35	0.31	5.35	0.29	5.35	5.35	0.35	1.3	5.4	2.72	5.4	0.88	5.4	1.23	5.4	4.06	5.4	0.65	5.4
0.31	5.4	0.35	5.4	0.33	5.4	0.51	5.4	0.35	5.4	0.32	5.4	0.3	5.4	5.4	0.37	1.23	5.45	2.64	5.45	0.72	5.45	0.65	5.45	3.97	5.45	0.81	5.45
0.32	5.45	0.46	5.45	0.33	5.45	0.51	5.45	0.34	5.45	0.32	5.45	0.29	5.45	5.45	0.39	1.43	5.5	2.52	5.5	0.57	5.5	0.4	5.5	3.89	5.5	2.3	5.5
0.32	5.5	0.41	5.5	0.31	5.5	0.5	5.5	0.34	5.5	0.37	5.5	0.3	5.5	5.5	0.49	1.23	5.55	2.44	5.55	1.49	5.55	0.46	5.55	3.93	5.55	3.02	5.55
0.31	5.55	0.39	5.55	0.4	5.55	0.49	5.55	0.39	5.55	0.41	5.55	0.39	5.55	5.55	0.42	1.06	5.6	2.22	5.6	1.51	5.6	1.2	5.6	3.93	5.6	2.85	5.6
0.32	5.6	0.37	5.6	0.32	5.6	0.5	5.6	0.43	5.6	0.32	5.6	0.45	5.6	5.6	0.36	1.56	5.65	1.92	5.65	1.98	5.65	0.57	5.65	3.97	5.65	3.06	5.65
0.32	5.65	0.38	5.65	0.33	5.65	0.5	5.65	0.56	5.65	0.38	5.65	0.32	5.65	5.65	0.37	1.68	5.7	1.58	5.7	1.98	5.7	0.35	5.7	3.94	5.7	3.17	5.7
0.32	5.7	0.39	5.7	0.39	5.7	0.54	5.7	0.39	5.7	0.42	5.7	0.32	5.7	5.7	0.43	1.66	5.75	1.63	5.75	1.5	5.75	0.44	5.75	3.98	5.75	2.91	5.75
0.35	5.75	0.39	5.75	0.4	5.75	0.51	5.75	0.39	5.75	0.38	5.75	0.38	5.75	5.75	0.48	1.76	5.8	2.24	5.8	1.18	5.8	1.78	5.8	3.93	5.8	1.53	5.8
0.33	5.8	0.37	5.8	0.36	5.8	0.51	5.8	0.37	5.8	0.38	5.8	0.38	5.8	5.8	0.38	1.84	5.85	2.63	5.85	1.59	5.85	2.28	5.85	3.84	5.85	0.81	5.85
0.45	5.85	0.49	5.85	0.35	5.85	0.52	5.85	0.38	5.85	0.35	5.85	0.34	5.85	5.85	0.38	2.12	5.9	2.41	5.9	1.79	5.9	2.32	5.9	3.79	5.9	0.54	5.9
0.34	5.9	0.65	5.9	0.43	5.9	0.58	5.9	0.39	5.9	0.37	5.9	0.35	5.9	5.9	0.49	2.02	5.95	2.45	5.95	1.69	5.95	2.3	5.95	3.75	5.95	0.46	5.95
0.33	5.95	0.59	5.95	0.55	5.95	1.04	5.95	0.39	5.95	0.36	5.95	0.43	5.95	5.95	0.39	2.13	6	2.58	6	1.7	6	2.44	6	3.67	6	1.23	6
0.33	6	0.42	6	0.47	6	0.83	6	0.35	6	0.37	6	0.33	6	6	0.38	0.53	6.05	2.41	6.05	1.89	6.05	2.37	6.05	3.36	6.05	1.84	6.05
0.36	6.05	0.7	6.05	0.78	6.05	0.76	6.05	0.61	6.05	0.41	6.05	0.36	6.05	6.05	0.55	2.3	6.1	2.1	6.1	1.54	6.1	2.39	6.1	2.93	6.1	0.82	6.1
0.38	6.1	0.76	6.1	0.62	6.1	0.65	6.1	0.39	6.1	0.49	6.1	0.41	6.1	6.1	0.39	2.17	6.15	2.23	6.15	1	6.15	2.37	6.15	1.77	6.15	0.59	6.15
0.4	6.15	0.53	6.15	1.23	6.15	0.59	6.15	0.45	6.15	0.41	6.15	0.39	6.15	6.15	0.38	2.14	6.2	2.3	6.2	1.27	6.2	2.24	6.2	0.9	6.2	2.35	6.2
0.39	6.2	0.71	6.2	1.27	6.2	0.59	6.2	0.86	6.2	0.39	6.2	0.36	6.2	6.2	0.49	2.4	6.25	2.33	6.25	2.01	6.25	1.95	6.25	0.62	6.25	2.96	6.25
0.38	6.25	1	6.25	1.39	6.25	0.6	6.25	1.3	6.25	0.75	6.25	0.34	6.25	6.25	0.42	2.3	6.3	2.29	6.3	1.9	6.3	1.71	6.3	0.61	6.3	3	6.3
0.41	6.3	1.33	6.3	1.29	6.3	0.57	6.3	0.8	6.3	0.96	6.3	0.42	6.3	6.3	0.47	2.46	6.35	2.3	6.35	1.86	6.35	1.41	6.35	0.53	6.35	3.14	6.35
0.42	6.35	1.75	6.35	1	6.35	0.57	6.35	0.59	6.35	0.7	6.35	0.46	6.35	6.35	0.39	2.58	6.4	2.42	6.4	2.15	6.4	1.47	6.4	0.56	6.4	3.19	6.4
0.43	6.4	2.26	6.4	2.28	6.4	0.71	6.4	1.21	6.4	0.63	6.4	0.37	6.4	6.4	0.42	2.84	6.45	2.38	6.45	2.31	6.45	1.77	6.45	2.09	6.45	3.24	6.45
0.38	6.45	1.46	6.45	1.13	6.45	0.69	6.45	1.1	6.45	0.83	6.45	0.48	6.45	6.45	0.42	2.39	6.5	2.42	6.5	2.46	6.5	2.39	6.5	3.13	6.5	3.13	6.5
0.51	6.5	0.94	6.5	0.67	6.5	1.09	6.5	1.75	6.5	0.91	6.5	0.39	6.5	6.5	0.39	1.08	6.55	2.46	6.55	2.57	6.55	2.42	6.55	2.83	6.55	3.05	6.55
0.58	6.55	0.71	6.55	1.24	6.55	1.27	6.55	1.01	6.55	0.76	6.55	0.35	6.55	6.55	0.48	0.72	6.6	2.69	6.6	2.51	6.6	2.54	6.6	2.54	6.6	3.03	6.6
0.78	6.6	0.73	6.6	3.24	6.6	0.96	6.6	0.87	6.6	0.55	6.6	0.39	6.6	6.6	0.5	0.79	6.65	2.62	6.65	2.37	6.65	2.7	6.65	2.36	6.65	2.99	6.65
1.02	6.65	1.04	6.65	2.59	6.65	0.81	6.65	0.55	6.65	0.44	6.65	0.35	6.65	6.65	0.58	0.72	6.7	2.7	6.7	2.45	6.7	2.65	6.7	2.71	6.7	2.84	6.7
0.9	6.7	0.72	6.7	2.8	6.7	1.16	6.7	0.42	6.7	0.44	6.7	0.37	6.7	6.7	0.73	0.56	6.75	2.67	6.75	2.73	6.75	2.4	6.75	2.63	6.75	2.79	6.75
0.58	6.75	0.88	6.75	1.75	6.75	0.97	6.75	0.48	6.75	0.5	6.75	0.52	6.75	6.75	1.1	0.5	6.8	2.52	6.8	2.88	6.8	2.35	6.8	2.68	6.8	2.86	6.8
0.8	6.8	0.77	6.8	0.97	6.8	0.72	6.8	0.75	6.8	0.48	6.8	0.62	6.8	6.8	0.66	0.49	6.85	2.52	6.85	2.98	6.85	2.56	6.85	2.98	6.85	2.72	6.85
0.83	6.85	0.78	6.85	1.69	6.85	0.6	6.85	0.88	6.85	0.54	6.85	0.66	6.85	6.85	1.12	0.5	6.9	2.3	6.9	3.03	6.9	2.61	6.9	2.23	6.9	2.78	6.9
0.5	6.9	1.65	6.9	1.47	6.9	0.67	6.9	0.97	6.9	0.75	6.9	1.08	6.9	6.9	1.06	0.5	6.95	2.3	6.95	2.79	6.95	2.67	6.95	1.19	6.95	3.23	6.95
0.45	6.95	1.19	6.95	1.62	6.95	0.74	6.95	1.22	6.95	1.05	6.95	1.3	6.95	6.95	0.62	0.47	7	2.54	7	2.52	7	2.57	7	0.68	7	3.41	7
0.44	7	0.86	7	1.06	7	0.74	7	1.46	7	1.27	7	1.71	7	7	0.73	0.48	7.05	2.09	7.05	0.83	7.05	2.42	7.05	0.47	7.05	3.44	7.05
0.57	7.05	1.28	7.05	0.94	7.05	0.92	7.05	1.74	7.05	1.36	7.05	2.72	7.05	7.05	2.65	0.47	7.1	1	7.1	2.33	7.1	2.27	7.1	0.51	7.1	3.53	7.1
0.47	7.1	2.55	7.1	1.43	7.1	0.65	7.1	1.62	7.1	1.25	7.1	1.79	7.1	7.1	1.55	0.52	7.15	0.67	7.15	1.62	7.15	2.21	7.15	0.98	7.15	3.44	7.15
0.4	7.15	1.92	7.15	2.86	7.15	0.6	7.15	2.77	7.15	1.04	7.15	1.33	7.15	7.15	1.52	0.82	7.2	0.57	7.2	0.85	7.2	2.36	7.2	0.7	7.2	3.48	7.2
0.48	7.2	1.46	7.2	2.42	7.2	0.71	7.2	2.16	7.2	1.29	7.2	0.83	7.2	7.2	1.68	0.75	7.25	0.52	7.25	0.5	7.25	2.19	7.25	2.94	7.25	3.63	7.25
0.62	7.25	2.31	7.25	2.37	7.25	0.92	7.25	1.86	7.25	2.93	7.25	0.56	7.25	7.25	2.26	0.74	7.3	0.48	7.3	0.41	7.3	2.43	7.3	3.33	7.3	3.67	7.3
0.91	7.3	4.4	7.3	1.21	7.3	1.43	7.3	4.49	7.3	3.25	7.3	0.64	7.3	7.3	2.06	0.81	7.35	0.5	7.35	0.39	7.35	2.62	7.35	3.56	7.35	3.56	7.35
1.12	7.35	3.09	7.35	0.88	7.35	1.46	7.35	3.44	7.35	4.72	7.35	0.74	7.35	7.35	1.66	0.86	7.4	0.48	7.4	0.36	7.4	2.54	7.4	3.49	7.4	3.52	7.4
1.12	7.4	1.91	7.4	1.14	7.4	1.99	7.4	1.64	7.4	4.19	7.4	0.87	7.4	7.4	1.69	1.42	7.45	0.47	7.45	0.37	7.45	2.32	7.45	3.48	7.45	3.52	7.45
1.53	7.45	1.31	7.45	1.17	7.45	2.29	7.45	1.03	7.45	2.58	7.45	0.86	7.45	7.45	2.84	1.92	7.5	0.48	7.5	0.4	7.5	2.33	7.5	3.58	7.5	3.61	7.5
2.04	7.5	4.15	7.5	1.12	7.5	2.49	7.5	1.59	7.5	1.49	7.5	0.92	7.5	7.5	1.71	2.42	7.55	0.52	7.55	0.49	7.55	2.38	7.55	3.62	7.55	3.65	7.55
4.76	7.55	4.49	7.55	1.08	7.55	2.66	7.55	1.94	7.55	1.06	7.55	0.75	7.55	7.55	1.26	2.54	7.6	0.9	7.6	0.96	7.6	2.4	7.6	3.57	7.6	3.55	7.6
4.68	7.6	2.76	7.6	1.27	7.6	2.52	7.6	1.81	7.6	1.37	7.6	1.07	7.6	7.6	1.12	2.51	7.65	0.92	7.65	1.22	7.65	2.36	7.65	3.51	7.65	3.41	7.65
4.84	7.65	2.31	7.65	2.53	7.65	3.53	7.65	1.18	7.65	1.6	7.65	1.49	7.65	7.65	1.61	2.47	7.7	1.46	7.7	1.24	7.7	2.28	7.7	3.46	7.7	3.25	7.7
4.86	7.7	3.82	7.7	1.61	7.7	2.32	7.7	2.05	7.7	1.2	7.7	0.86	7.7	7.7	1.26	2.76	7.75	1.52	7.75	1.47	7.75	2.43	7.75	3.35	7.75	3.25	7.75
4.02	7.75	4.9	7.75	1.46	7.75	1.86	7.75	1.75	7.75	1.14	7.75	0.88	7.75	7.75	1.05	2.74	7.8	1.8	7.8	1.49	7.8	2.58	7.8	3.32	7.8	3.32	7.8
3.09	7.8	3.65	7.8	2.08	7.8	3.65	7.8	1.41	7.8	4.06	7.8	0.86	7.8	7.8	1.64	2.64	7.85	2.05	7.85	1.37	7.85	2.75	7.85	3.39	7.85	3.16	7.85
1.84	7.85	2.57	7.85	2.03	7.85	3.14	7.85	1.94	7.85	4.66	7.85	1.49	7.85	7.85	3.24	2.84	7.9	2.35	7.9	2.23	7.9	2.72	7.9	3.44	7.9	2.29	7.9
1.21	7.9	3.11	7.9	1.94	7.9	1.87	7.9	1.41	7.9	4.76	7.9	1.2	7.9	7.9	1.86	2.91	7.95	2.75	7.95	2.56	7.95	2.8	7.95	3.65	7.95	2.99	7.95
1.46	7.95	4.11	7.95	1.32	7.95	1.54	7.95	0.86	7.95	3.36	7.95	1	7.95	7.95	1.78	2.75	8	2.93	8	2.55	8	2.94	8	4	8	3.11	8
0.9	8	3.07	8	1.15	8	1.52	8	0.99	8	2.06	8	1.73	8	8	3.33	1.75	8.05	2.97	8.05	2.48	8.05	2.95	8.05	4.19	8.05	3.17	8.05
0.85	8.05	2.65	8.05	1.04	8.05	1.67	8.05	0.98	8.05	1.36	8.05	1.29	8.05	8.05	3.04	1.93	8.1	3.03	8.1	2.64	8.1	2.92	8.1	4.22	8.1	3.2	8.1
1.5	8.1	1.99	8.1	0.62	8.1	1.36	8.1	0.88	8.1	2.12	8.1	1.05	8.1	8.1	2.57	2.02	8.15	3.28	8.15	2.79	8.15	2.95	8.15	4.37	8.15	3.24	8.15
1.04	8.15	1.8	8.15	0.54	8.15	1.44	8.15	1.3	8.15	1.7	8.15	1.13	8.15	8.15	2.08	2.34	8.2	3.25	8.2	2.64	8.2	3.08	8.2	4.43	8.2	3.28	8.2
0.98	8.2	1.21	8.2	0.9	8.2	1.95	8.2	1.19	8.2	1.1	8.2	1.24	8.2	8.2	1.77	2.52	8.25	2.71	8.25	2.82	8.25	3.21	8.25	4.46	8.25	3.36	8.25
1.4	8.25	0.99	8.25	0.99	8.25	5.12	8.25	1.49	8.25	1.31	8.25	1.08	8.25	8.25	2.58	2.68	8.3	1.59	8.3	2.86	8.3	3.11	8.3	4.38	8.3	3.39	8.3
1.95	8.3	0.75	8.3	0.57	8.3	6.38	8.3	7.2	8.3	3.21	8.3	1.5	8.3	8.3	2.69	2.76	8.35	1.64	8.35	2.37	8.35	2.73	8.35	4.38	8.35	3.52	8.35
2.25	8.35	0.61	8.35	0.65	8.35	5.46	8.35	7.88	8.35	3.61	8.35	1.23	8.35	8.35	2.06	2.78	8.4	1.87	8.4	1.96	8.4	2.21	8.4	4.26	8.4	3.47	8.4
1.52	8.4	0.63	8.4	0.56	8.4	4.02	8.4	6.75	8.4	2.33	8.4	2.36	8.4	8.4	1.32	2.47	8.45	1.67	8.45	1.9	8.45	2.24	8.45	4.12	8.45	3.46	8.45
0.95	8.45	1.17	8.45	0.54	8.45	2.28	8.45	4.25	8.45	1.61	8.45	1.78	8.45	8.45	1.13	2.27	8.5	2.27	8.5	1.5	8.5	2.27	8.5	4.01	8.5	3.48	8.5
1.04	8.5	0.98	8.5	0.72	8.5	1.64	8.5	3.24	8.5	1.12	8.5	1	8.5	8.5	0.67	1.96	8.55	2.47	8.55	2.11	8.55	2.44	8.55	3.9	8.55	3.73	8.55
0.85	8.55	0.73	8.55	0.45	8.55	1.39	8.55	3.4	8.55	0.78	8.55	1.4	8.55	8.55	0.65	1.36	8.6	2.37	8.6	2.05	8.6	2.82	8.6	3.8	8.6	3.79	8.6
0.97	8.6	0.76	8.6	0.47	8.6	1.14	8.6	1.88	8.6	1.17	8.6	1.17	8.6	8.6	0.77	0.97	8.65	2.93	8.65	1.61	8.65	3.12	8.65	3.85	8.65	3.71	8.65
1.66	8.65	0.7	8.65	0.47	8.65	1.37	8.65	1.92	8.65	2.62	8.65	1.51	8.65	8.65	1.28	1.36	8.7	2.87	8.7	2.31	8.7	2.55	8.7	3.82	8.7	3.25	8.7
1.84	8.7	0.61	8.7	0.48	8.7	1.82	8.7	2.43	8.7	2.48	8.7	1.08	8.7	8.7	0.94	0.98	8.75	2.67	8.75	2.53	8.75	2.14	8.75	3.73	8.75	2.56	8.75
1.2	8.75	0.68	8.75	0.48	8.75	2.81	8.75	2.54	8.75	2.37	8.75	2.14	8.75	8.75	0.82	0.75	8.8	1.92	8.8	2.56	8.8	2.45	8.8	3.69	8.8	2.55	8.8
3.97	8.8	1.05	8.8	0.49	8.8	3.89	8.8	3.26	8.8	2.41	8.8	1.3	8.8	8.8	0.76	0.61	8.85	2.29	8.85	1.96	8.85	1.97	8.85	3.74	8.85	2.53	8.85
5.45	8.85	1.1	8.85	0.49	8.85	2.51	8.85	2.88	8.85	1.8	8.85	1.57	8.85	8.85	0.61	0.66	8.9	2.77	8.9	2.34	8.9	1.81	8.9	3.71	8.9	1.7	8.9
3.98	8.9	0.82	8.9	0.49	8.9	1.95	8.9	2.58	8.9	1.71	8.9	1.86	8.9	8.9	1.18	1.24	8.95	2.08	8.95	2.15	8.95	2.55	8.95	3.7	8.95	1.72	8.95
4.01	8.95	0.64	8.95	0.49	8.95	1.35	8.95	3.59	8.95	1.19	8.95	1.75	8.95	8.95	2.5	1.07	9	1.49	9	1.64	9	2.05	9	3.58	9	1.98	9
3.61	9	0.92	9	5.36	9	1.07	9	2.71	9	1.04	9	1.7	9	9	1.82	1.31	9.05	1.64	9.05	1.22	9.05	1.92	9.05	3.41	9.05	2.17	9.05
2.46	9.05	1.32	9.05	6.36	9.05	1.37	9.05	2.1	9.05	1.17	9.05	1.58	9.05	9.05	1.45	1.09	9.1	1.06	9.1	1.08	9.1	2.22	9.1	3.51	9.1	1.96	9.1
1.63	9.1	0.9	9.1	5.09	9.1	3.68	9.1	1.67	9.1	4.95	9.1	1.25	9.1	9.1	0.91	0.73	9.15	0.84	9.15	1.26	9.15	2.77	9.15	3.59	9.15	3.22	9.15
1.15	9.15	0.57	9.15	2.49	9.15	5.61	9.15	1.86	9.15	7.2	9.15	0.73	9.15	9.15	1	0.78	9.2	0.86	9.2	0.77	9.2	3.03	9.2	3.76	9.2	3.75	9.2
1.12	9.2	0.81	9.2	1.32	9.2	5.73	9.2	1.56	9.2	6.95	9.2	0.56	9.2	9.2	1.69	0.64	9.25	1.38	9.25	0.79	9.25	3.18	9.25	3.9	9.25	4.01	9.25
1.29	9.25	1.16	9.25	0.91	9.25	4.64	9.25	2.06	9.25	5.58	9.25	0.66	9.25	9.25	1.74	0.61	9.3	1.59	9.3	0.53	9.3	3.15	9.3	4	9.3	3.99	9.3
1.19	9.3	1.46	9.3	1.23	9.3	3.36	9.3	1.66	9.3	3.77	9.3	1.16	9.3	9.3	1.04	1.41	9.35	1.52	9.35	0.61	9.35	2.74	9.35	4.12	9.35	4.03	9.35
4.12	9.35	1.44	9.35	3.72	9.35	2.1	9.35	1.33	9.35	2.16	9.35	0.74	9.35	9.35	0.74	1.3	9.4	1.29	9.4	0.8	9.4	1.94	9.4	4.25	9.4	4.39	9.4
6.44	9.4	5.18	9.4	2.75	9.4	2.12	9.4	2.26	9.4	1.76	9.4	0.7	9.4	9.4	1.87	1	9.45	1.02	9.45	0.71	9.45	2.38	9.45	4.36	9.45	4.54	9.45
5.8	9.45	8.47	9.45	1.53	9.45	2.9	9.45	2.91	9.45	2.18	9.45	0.76	9.45	9.45	4.21	0.74	9.5	0.76	9.5	0.61	9.5	2.73	9.5	4.43	9.5	4.65	9.5
4.39	9.5	8.86	9.5	0.92	9.5	3.46	9.5	3.55	9.5	5.15	9.5	0.6	9.5	9.5	3.8	0.64	9.55	0.61	9.55	0.55	9.55	2.6	9.55	4.22	9.55	4.79	9.55
2.8	9.55	8.36	9.55	1.15	9.55	3	9.55	2.53	9.55	4.57	9.55	0.57	9.55	9.55	4.31	0.76	9.6	0.61	9.6	0.58	9.6	2.4	9.6	3.91	9.6	4.79	9.6
3.86	9.6	6.55	9.6	0.66	9.6	1.96	9.6	5.22	9.6	3.42	9.6	0.59	9.6	9.6	2.75	0.91	9.65	0.6	9.65	0.44	9.65	2.19	9.65	3.65	9.65	4.65	9.65
3.6	9.65	4.02	9.65	1.63	9.65	1.34	9.65	6.2	9.65	1.83	9.65	1.12	9.65	9.65	1.12	0.64	9.7	0.63	9.7	0.45	9.7	1.42	9.7	3.8	9.7	4.35	9.7
3.58	9.7	2.08	9.7	4.32	9.7	1.16	9.7	6.04	9.7	1.06	9.7	1.14	9.7	9.7	4.04	0.39	9.75	0.62	9.75	0.6	9.75	0.93	9.75	4	9.75	3.27	9.75
3.89	9.75	1.47	9.75	3.32	9.75	1.28	9.75	5.9	9.75	0.92	9.75	0.69	9.75	9.75	5.23	0.92	9.8	0.65	9.8	1.66	9.8	0.64	9.8	3.81	9.8	1.78	9.8
3.64	9.8	1.62	9.8	3.45	9.8	1.96	9.8	4.71	9.8	1.35	9.8	0.6	9.8	9.8	4.09	0.94	9.85	0.65	9.85	1.2	9.85	1.32	9.85	3.7	9.85	1.28	9.85
3.36	9.85	1.48	9.85	2.41	9.85	4.51	9.85	2.79	9.85	0.85	9.85	1.17	9.85	9.85	2.47	2.09	9.9	0.75	9.9	0.77	9.9	1.78	9.9	3.64	9.9	0.86	9.9
3.48	9.9	0.85	9.9	1.49	9.9	7.59	9.9	1.72	9.9	0.83	9.9	1.52	9.9	9.9	1.97	2.11	9.95	0.73	9.95	0.54	9.95	1.76	9.95	3.77	9.95	0.93	9.95
4.11	9.95	0.88	9.95	1.93	9.95	7.91	9.95	1.15	9.95	0.75	9.95	0.82	9.95	9.95	2.03	1.64	10	0.67	10	0.54	10	1.71	10	2.92	10	0.77	10
4.2	10	0.99	10	3.24	10	6.24	10	0.75	10	0.7	10	0.59	10	10	2.76	0.78	10.05	0.67	10.05	0.75	10.05	1.7	10.05	4.01	10.05	0.85	10.05
4.23	10.05	1.72	10.05	2.71	10.05	5.58	10.05	2.5	10.05	1.05	10.05	0.6	10.05	10.05	2.98	1.32	10.1	0.69	10.1	0.62	10.1	1.08	10.1	4.08	10.1	0.78	10.1
4.37	10.1	2.53	10.1	2.18	10.1	5.92	10.1	1.86	10.1	1.97	10.1	1.29	10.1	10.1	4.33	1.87	10.15	0.82	10.15	0.57	10.15	0.62	10.15	4.16	10.15	0.75	10.15
3.04	10.15	1.64	10.15	1.65	10.15	6.3	10.15	1.19	10.15	1.53	10.15	1.25	10.15	10.15	5.62	1.51	10.2	0.75	10.2	0.58	10.2	0.58	10.2	4.12	10.2	0.61	10.2
2.93	10.2	1.21	10.2	1.5	10.2	6.22	10.2	1.94	10.2	1.19	10.2	1.02	10.2	10.2	4.42	1.94	10.25	1.08	10.25	0.59	10.25	1.22	10.25	3.48	10.25	0.59	10.25
2.97	10.25	1.8	10.25	1.5	10.25	6.32	10.25	3.47	10.25	2.82	10.25	4.99	10.25	10.25	2.34	1.95	10.3	0.93	10.3	0.64	10.3	1.35	10.3	2.81	10.3	0.54	10.3
1.4	10.3	2.04	10.3	1.13	10.3	6.11	10.3	4.74	10.3	1.87	10.3	6.39	10.3	10.3	1.55	2.3	10.35	1.89	10.35	1.7	10.35	0.78	10.35	3.31	10.35	2.11	10.35
0.85	10.35	1.81	10.35	0.97	10.35	4.63	10.35	7.06	10.35	1.17	10.35	6.64	10.35	10.35	1.73	3.47	10.4	2.19	10.4	2.25	10.4	0.58	10.4	2.61	10.4	1.66	10.4
2.63	10.4	2.42	10.4	1.59	10.4	2.5	10.4	7.41	10.4	0.65	10.4	7.83	10.4	10.4	2.06	4.26	10.45	1.34	10.45	2.31	10.45	0.59	10.45	2.28	10.45	0.95	10.45
2	10.45	1.79	10.45	1.07	10.45	1.95	10.45	5.15	10.45	1.17	10.45	8.81	10.45	10.45	1.36	4.51	10.5	1.08	10.5	1.35	10.5	0.59	10.5	2.79	10.5	0.62	10.5
1.28	10.5	1.31	10.5	0.91	10.5	4.26	10.5	2.5	10.5	3.26	10.5	8.48	10.5	10.5	1.13	4.38	10.55	2.04	10.55	1.29	10.55	0.57	10.55	2.9	10.55	0.5	10.55
1.07	10.55	1.22	10.55	0.83	10.55	3.38	10.55	1.26	10.55	1.78	10.55	7.44	10.55	10.55	1.72	4.29	10.6	1.68	10.6	1.5	10.6	0.65	10.6	1.87	10.6	0.51	10.6
1.87	10.6	1.02	10.6	1.57	10.6	2.52	10.6	0.83	10.6	1.37	10.6	6.96	10.6	10.6	1.5	4.22	10.65	2.11	10.65	1.3	10.65	0.67	10.65	2.35	10.65	0.56	10.65
3.14	10.65	1.55	10.65	2.57	10.65	2.96	10.65	1.68	10.65	0.78	10.65	6.67	10.65	10.65	0.98	4.16	10.7	2.52	10.7	1.15	10.7	0.58	10.7	1.91	10.7	0.58	10.7
5.11	10.7	1.29	10.7	1.67	10.7	2.59	10.7	4.26	10.7	3.56	10.7	5.69	10.7	10.7	1.24	3.75	10.75	2.78	10.75	1.64	10.75	0.55	10.75	1.14	10.75	0.55	10.75
4.03	10.75	1.09	10.75	1.46	10.75	1.64	10.75	4.48	10.75	5.93	10.75	3.75	10.75	10.75	1.52	3.26	10.8	3.3	10.8	2.31	10.8	0.59	10.8	0.89	10.8	0.52	10.8
2.42	10.8	1.82	10.8	1.6	10.8	1.34	10.8	4.42	10.8	7.15	10.8	1.76	10.8	10.8	2.47	2.42	10.85	3.75	10.85	3.53	10.85	0.63	10.85	0.75	10.85	0.53	10.85
1.43	10.85	1.78	10.85	2.19	10.85	2.82	10.85	4.4	10.85	7.77	10.85	1.23	10.85	10.85	4.78	1.76	10.9	4.28	10.9	4.29	10.9	0.59	10.9	0.66	10.9	0.57	10.9
0.74	10.9	1.4	10.9	2.3	10.9	1.93	10.9	2.87	10.9	7.63	10.9	1.77	10.9	10.9	4.57	1.74	10.95	4.46	10.95	4.57	10.95	0.63	10.95	0.61	10.95	0.64	10.95
0.88	10.95	1.57	10.95	2.59	10.95	5.07	10.95	2.53	10.95	7.09	10.95	2.24	10.95	10.95	3.46	1.99	11	4.32	11	4.53	11	0.78	11	0.62	11	0.56	11
1.49	11	1.48	11	2.11	11	8.26	11	2.96	11	6.08	11	1.94	11	11	2.23	1.04	11.05	4.11	11.05	3.27	11.05	1.05	11.05	1.65	11.05	0.62	11.05
1.69	11.05	2.39	11.05	1.94	11.05	7.78	11.05	2.45	11.05	1.94	11.05	1.92	11.05	11.05	1.86	1.3	11.1	3.49	11.1	4.25	11.1	1.23	11.1	0.36	11.1	0.54	11.1
1.07	11.1	2.83	11.1	1.64	11.1	7.02	11.1	2.27	11.1	6.01	11.1	2.47	11.1	11.1	1.86	1.03	11.15	2.13	11.15	3.8	11.15	2.16	11.15	1.09	11.15	0.58	11.15
1.88	11.15	2.8	11.15	1.96	11.15	5.48	11.15	1.8	11.15	6.88	11.15	1.91	11.15	11.15	1.86	1.23	11.2	1.65	11.2	3.16	11.2	2.4	11.2	1.35	11.2	0.58	11.2
2.03	11.2	2.12	11.2	2.45	11.2	3.85	11.2	1.69	11.2	7.75	11.2	1.46	11.2	11.2	2.15	0.87	11.25	1.14	11.25	2.99	11.25	1.75	11.25	0.76	11.25	0.6	11.25
1.26	11.25	1.9	11.25	2.28	11.25	4.66	11.25	1.8	11.25	7.06	11.25	1.09	11.25	11.25	2.73	0.83	11.3	1.13	11.3	3.39	11.3	1.9	11.3	0.59	11.3	0.57	11.3
1.1	11.3	2.09	11.3	1.45	11.3	5.53	11.3	4.42	11.3	5.83	11.3	1.16	11.3	11.3	4.54	0.84	11.35	1.42	11.35	4.09	11.35	2.31	11.35	0.57	11.35	0.57	11.35
4.33	11.35	1.66	11.35	1.46	11.35	5.29	11.35	5.99	11.35	4.18	11.35	2.79	11.35	11.35	3.26	1.18	11.4	1.56	11.4	4.08	11.4	2.14	11.4	0.61	11.4	0.81	11.4
5.63	11.4	3.85	11.4	1.6	11.4	6.05	11.4	5.15	11.4	2.39	11.4	1.63	11.4	11.4	1.95	0.87	11.45	1.09	11.45	2.98	11.45	2.88	11.45	0.62	11.45	2.6	11.45
5.07	11.45	3.45	11.45	1.57	11.45	5.94	11.45	4.59	11.45	1.97	11.45	1.16	11.45	11.45	1.73	0.77	11.5	1.12	11.5	1.81	11.5	3.27	11.5	0.67	11.5	2.2	11.5
5.06	11.5	2.14	11.5	1.39	11.5	3.87	11.5	3.7	11.5	1.54	11.5	1.72	11.5	11.5	1.91	0.75	11.55	1.24	11.55	1.14	11.55	3.48	11.55	0.57	11.55	2.49	11.55
6.08	11.55	1.75	11.55	1.5	11.55	2.33	11.55	3.01	11.55	1.28	11.55	1.89	11.55	11.55	2.16	0.73	11.6	0.9	11.6	0.91	11.6	4.2	11.6	0.54	11.6	2.01	11.6
6.34	11.6	1.55	11.6	1.36	11.6	1.95	11.6	2.43	11.6	1.45	11.6	1.55	11.6	11.6	1.79	0.68	11.65	0.83	11.65	0.8	11.65	4.3	11.65	0.54	11.65	1.51	11.65
5.96	11.65	1.34	11.65	1.89	11.65	1.64	11.65	1.98	11.65	1.87	11.65	1.83	11.65	11.65	1.52	1.03	11.7	0.81	11.7	0.99	11.7	4.24	11.7	0.59	11.7	1.49	11.7
5.09	11.7	1.51	11.7	1.77	11.7	1.32	11.7	2.39	11.7	1.35	11.7	3.09	11.7	11.7	1.76	1.04	11.75	0.93	11.75	0.82	11.75	4.01	11.75	0.6	11.75	2.51	11.75
3.59	11.75	1.48	11.75	1.06	11.75	1.48	11.75	1.99	11.75	1.74	11.75	3.6	11.75	11.75	1.99	2.91	11.8	1.42	11.8	0.76	11.8	3.38	11.8	0.66	11.8	3.11	11.8
2.02	11.8	1.46	11.8	0.91	11.8	1.78	11.8	2.05	11.8	1.36	11.8	2.97	11.8	11.8	1.75	2.01	11.85	4.73	11.85	0.96	11.85	2.1	11.85	0.66	11.85	3.18	11.85
1.27	11.85	1.35	11.85	0.92	11.85	1.66	11.85	1.31	11.85	1.47	11.85	2.05	11.85	11.85	1.65	1.31	11.9	5.38	11.9	0.79	11.9	1.88	11.9	0.62	11.9	4.08	11.9
0.97	11.9	3.29	11.9	1.14	11.9	1.4	11.9	1.46	11.9	1.54	11.9	1.44	11.9	11.9	2.51	0.83	11.95	5.44	11.95	0.99	11.95	2.97	11.95	0.57	11.95	3.76	11.95
1.45	11.95	3.2	11.95	0.86	11.95	1.42	11.95	1.97	11.95	1.8	11.95	1.11	11.95	11.95	1.43	0.62	12	5.27	12	1.46	12	2.51	12	0.55	12	4.55	12
1.58	12	2.97	12	0.74	12	1.53	12	1.52	12	1.77	12	1.15	12	12	1.01	0.75	12.05	5.03	12.05	1.41	12.05	1.75	12.05	0.62	12.05	4.51	12.05
1.71	12.05	2.32	12.05	1.32	12.05	1.79	12.05	1.48	12.05	2.98	12.05	1.73	12.05	12.05	1.58	2.05	12.1	4.78	12.1	1.13	12.1	1.22	12.1	0.6	12.1	4.62	12.1
1.49	12.1	1.75	12.1	1.17	12.1	1.45	12.1	1.17	12.1	3.34	12.1	1.58	12.1	12.1	1.34	1.27	12.15	4.56	12.15	1.35	12.15	0.89	12.15	0.63	12.15	4.6	12.15
1.32	12.15	1.55	12.15	1.03	12.15	1.98	12.15	1.24	12.15	2.06	12.15	1.51	12.15	12.15	1.4	1.69	12.2	4.59	12.2	0.8	12.2	0.78	12.2	1.53	12.2	4.26	12.2
1.28	12.2	1.27	12.2	1.06	12.2	3.12	12.2	1.35	12.2	2.31	12.2	1.54	12.2	12.2	1.24	1.29	12.25	4.72	12.25	1.01	12.25	0.99	12.25	2.96	12.25	3.36	12.25
1.22	12.25	1.1	12.25	1.09	12.25	3.97	12.25	1.7	12.25	1.8	12.25	2.08	12.25	12.25	1.12	1.46	12.3	4.99	12.3	1.04	12.3	0.95	12.3	3.23	12.3	1.74	12.3
1.33	12.3	0.86	12.3	1	12.3	2.18	12.3	2.72	12.3	1.8	12.3	2.7	12.3	12.3	0.97	1.4	12.35	5.14	12.35	1.79	12.35	0.85	12.35	2.66	12.35	1.24	12.35
2.19	12.35	1.53	12.35	1.17	12.35	1.54	12.35	4.28	12.35	1.51	12.35	3.24	12.35	12.35	1.11	1.52	12.4	5.23	12.4	3.36	12.4	0.73	12.4	2.8	12.4	2.27	12.4
2.02	12.4	1.52	12.4	2.14	12.4	1.59	12.4	3.97	12.4	2.13	12.4	2.97	12.4	12.4	1.39	0.97	12.45	5.27	12.45	4.32	12.45	0.71	12.45	3.98	12.45	3.89	12.45
1.82	12.45	1.14	12.45	1.95	12.45	2.4	12.45	2.7	12.45	2.88	12.45	2.05	12.45	12.45	1.67	1.4	12.5	5.31	12.5	4.54	12.5	0.95	12.5	4	12.5	2.69	12.5
1.25	12.5	1.17	12.5	1.6	12.5	2.13	12.5	2.05	12.5	1.64	12.5	1.3	12.5	12.5	1.47	1.56	12.55	5.33	12.55	4.61	12.55	2.92	12.55	4.25	12.55	1.79	12.55
1.33	12.55	1.56	12.55	2.1	12.55	2.4	12.55	1.93	12.55	1.25	12.55	1.4	12.55	12.55	1.19	2.41	12.6	5.28	12.6	4.57	12.6	5.15	12.6	4.37	12.6	1.69	12.6
1.9	12.6	1.69	12.6	1.87	12.6	2.06	12.6	1.36	12.6	1.81	12.6	1.44	12.6	12.6	2.16	1.49	12.65	5.2	12.65	4.41	12.65	5.52	12.65	4.44	12.65	1.54	12.65
1.74	12.65	1.36	12.65	1.67	12.65	1.49	12.65	0.92	12.65	1.7	12.65	1.71	12.65	12.65	1.93	1.83	12.7	4.88	12.7	4.17	12.7	5.44	12.7	4.69	12.7	1.12	12.7
2.75	12.7	1.6	12.7	1.69	12.7	1.26	12.7	0.91	12.7	1.79	12.7	1.27	12.7	12.7	1.64	2.37	12.75	4.05	12.75	3.8	12.75	5.32	12.75	4.88	12.75	1.02	12.75
2.44	12.75	3.12	12.75	1.56	12.75	1.06	12.75	1.32	12.75	1.65	12.75	0.9	12.75	12.75	1.29	3.17	12.8	3.37	12.8	3.4	12.8	5.31	12.8	4.88	12.8	0.97	12.8
2.73	12.8	2.76	12.8	1.23	12.8	1.19	12.8	1.82	12.8	1.75	12.8	0.94	12.8	12.8	1.42	3.82	12.85	3.13	12.85	3.09	12.85	5.22	12.85	4.65	12.85	0.87	12.85
1.95	12.85	2.17	12.85	1.79	12.85	1.15	12.85	1.55	12.85	1.48	12.85	1.18	12.85	12.85	1.15	3.87	12.9	3.05	12.9	3.26	12.9	5.21	12.9	4.44	12.9	0.84	12.9
1.74	12.9	2.15	12.9	2.15	12.9	1.88	12.9	1.72	12.9	1.3	12.9	1.17	12.9	12.9	1.25	3.37	12.95	3.03	12.95	4.5	12.95	5.21	12.95	4.38	12.95	2.35	12.95
2.11	12.95	2.24	12.95	2.12	12.95	2.17	12.95	1.71	12.95	1.53	12.95	1.23	12.95	12.95	1.4	3.93	13	3.07	13	4.83	13	4.79	13	4.29	13	4.43	13
1.53	13	1.83	13	1.77	13	2.17	13	1.55	13	2.67	13	1.42	13	13	1.31	3.86	13.05	3.13	13.05	4.84	13.05	5.26	13.05	3.55	13.05	5.47	13.05
1.59	13.05	1.9	13.05	1.8	13.05	2.11	13.05	1.31	13.05	4.01	13.05	1.45	13.05	13.05	1.74	3.3	13.1	3.18	13.1	5.01	13.1	5.55	13.1	2.06	13.1	5.72	13.1
1.82	13.1	2.02	13.1	1.68	13.1	3.81	13.1	1.2	13.1	4.29	13.1	1.25	13.1	13.1	1.65	3.75	13.15	3.22	13.15	4.98	13.15	5.59	13.15	1.54	13.15	5.86	13.15
1.88	13.15	2.15	13.15	1.42	13.15	5.52	13.15	1.59	13.15	2.72	13.15	1.95	13.15	13.15	1.66	4.04	13.2	3.26	13.2	4.73	13.2	5.31	13.2	1.09	13.2	5.95	13.2
1.38	13.2	2.19	13.2	1.48	13.2	5.58	13.2	2.51	13.2	2.11	13.2	2.12	13.2	13.2	1.29	4.27	13.25	3.47	13.25	4.6	13.25	4.85	13.25	1.78	13.25	5.76	13.25
2.33	13.25	2	13.25	2.01	13.25	5.39	13.25	1.98	13.25	2.02	13.25	1.64	13.25	13.25	1.17	4.27	13.3	3.95	13.3	4.84	13.3	4.45	13.3	1.86	13.3	5.52	13.3
2.28	13.3	2.13	13.3	2.05	13.3	4.67	13.3	2.03	13.3	1.96	13.3	1.59	13.3	13.3	1.36	4.32	13.35	4.5	13.35	5.04	13.35	4.06	13.35	1.82	13.35	5.01	13.35
2.69	13.35	1.9	13.35	1.71	13.35	2.97	13.35	1.81	13.35	1.85	13.35	1.64	13.35	13.35	1.22	4.23	13.4	4.85	13.4	5.34	13.4	3.7	13.4	2.25	13.4	3.78	13.4
3.68	13.4	2.11	13.4	1.52	13.4	2.21	13.4	1.52	13.4	1.85	13.4	1.42	13.4	13.4	1.5	4.36	13.45	3.24	13.45	5.53	13.45	3.53	13.45	1.77	13.45	2.65	13.45
5.14	13.45	1.83	13.45	1.06	13.45	2.17	13.45	3.52	13.45	2.24	13.45	1.11	13.45	13.45	1.67	4.26	13.5	1.78	13.5	5.63	13.5	3.52	13.5	1.53	13.5	4.47	13.5
4.98	13.5	1.59	13.5	1.69	13.5	2.72	13.5	4.8	13.5	1.56	13.5	1.54	13.5	13.5	1.53	4.19	13.55	1.17	13.55	5.53	13.55	3.71	13.55	1.65	13.55	5.34	13.55
3	13.55	1.63	13.55	1.54	13.55	2.35	13.55	3.59	13.55	1.55	13.55	1.62	13.55	13.55	1.42	4.27	13.6	0.95	13.6	5.36	13.6	3.65	13.6	4.06	13.6	5.26	13.6
1.88	13.6	1.68	13.6	1.28	13.6	2.05	13.6	2.12	13.6	1.86	13.6	1.41	13.6	13.6	1.56	4.21	13.65	0.87	13.65	4.97	13.65	3.43	13.65	5.31	13.65	5.27	13.65
1.77	13.65	2.49	13.65	1.31	13.65	1.86	13.65	1.73	13.65	1.75	13.65	1.25	13.65	13.65	1.29	3.47	13.7	0.99	13.7	4.39	13.7	3.42	13.7	5.2	13.7	5.54	13.7
2.71	13.7	1.78	13.7	1.22	13.7	1.86	13.7	1.87	13.7	1.56	13.7	1.26	13.7	13.7	1.41	1.81	13.75	1.05	13.75	4.15	13.75	3.58	13.75	4.13	13.75	5.79	13.75
2.13	13.75	1.43	13.75	1.08	13.75	2.68	13.75	1.96	13.75	1.49	13.75	1.1	13.75	13.75	1.51	0.9	13.8	1.48	13.8	4.05	13.8	3.7	13.8	4.56	13.8	5.83	13.8
1.75	13.8	1.75	13.8	1.04	13.8	2.77	13.8	1.59	13.8	1.73	13.8	1.19	13.8	13.8	1.39	1.44	13.85	1.23	13.85	3.96	13.85	3.66	13.85	4	13.85	5.57	13.85
1.47	13.85	1.53	13.85	0.99	13.85	2.41	13.85	2.03	13.85	2.37	13.85	1.13	13.85	13.85	1.31	1.15	13.9	1.05	13.9	4.07	13.9	3.9	13.9	4.25	13.9	5.02	13.9
1.78	13.9	1.37	13.9	0.94	13.9	1.98	13.9	1.65	13.9	2.75	13.9	1.44	13.9	13.9	1.16	1	13.95	0.9	13.95	4.11	13.95	4.25	13.95	3.14	13.95	4.29	13.95
2.12	13.95	1.51	13.95	1.22	13.95	1.93	13.95	1.74	13.95	3.96	13.95	1.57	13.95	13.95	1.01	0.87	14	1.25	14	4.24	14	4.46	14	3.27	14	4.32	14
1.68	14	1.92	14	1.85	14	1.93	14	2.22	14	3.29	14	1.62	14	14	1.04	1	14.05	1.15	14.05	4.31	14.05	4.52	14.05	2.52	14.05	4.42	14.05
1.61	14.05	2.07	14.05	2.33	14.05	1.53	14.05	2.71	14.05	2.68	14.05	1.46	14.05	14.05	1.52	1.18	14.1	1.1	14.1	4.17	14.1	4.72	14.1	1.6	14.1	4.35	14.1
1.45	14.1	1.69	14.1	2.45	14.1	1.73	14.1	2.08	14.1	2.66	14.1	1.61	14.1	14.1	1.58	1.2	14.15	1.73	14.15	2.51	14.15	4.94	14.15	3.29	14.15	3.93	14.15
1.66	14.15	1.13	14.15	2.13	14.15	2.62	14.15	1.64	14.15	2.76	14.15	1.16	14.15	14.15	1.63	1.16	14.2	1.61	14.2	1.42	14.2	5.26	14.2	4.53	14.2	3.73	14.2
2.23	14.2	1.14	14.2	1.56	14.2	2.62	14.2	1.49	14.2	2.54	14.2	1.23	14.2	14.2	1.85	1.63	14.25	1.07	14.25	1.24	14.25	5.2	14.25	3.64	14.25	3.71	14.25
2.69	14.25	1.08	14.25	2.39	14.25	3.21	14.25	1.73	14.25	2.23	14.25	1.5	14.25	14.25	2.05	1.23	14.3	1.21	14.3	1.78	14.3	3.28	14.3	2.69	14.3	3.76	14.3
2.15	14.3	1.26	14.3	2	14.3	4.56	14.3	2.36	14.3	2.94	14.3	1.13	14.3	14.3	1.69	0.96	14.35	1.56	14.35	1.13	14.35	1.6	14.35	1.41	14.35	3.93	14.35
2.69	14.35	1.8	14.35	1.66	14.35	3.69	14.35	3.94	14.35	2.32	14.35	1.04	14.35	14.35	2.25	1.02	14.4	1.28	14.4	0.83	14.4	1.15	14.4	2.34	14.4	4.17	14.4
2.28	14.4	2.61	14.4	3.02	14.4	2.81	14.4	5.64	14.4	2.19	14.4	0.97	14.4	14.4	1.92	1.01	14.45	1.58	14.45	0.8	14.45	1.16	14.45	2.85	14.45	4.51	14.45
2.07	14.45	2.1	14.45	3.12	14.45	2.49	14.45	5.29	14.45	2.08	14.45	1.07	14.45	14.45	2.13	3.1	14.5	3.87	14.5	1.12	14.5	1.65	14.5	3.05	14.5	5.02	14.5
2.58	14.5	2.48	14.5	3.21	14.5	2.15	14.5	6.45	14.5	1.69	14.5	0.89	14.5	14.5	2.1	5.18	14.55	5.79	14.55	0.92	14.55	1.04	14.55	2.84	14.55	5.73	14.55
2.79	14.55	1.9	14.55	3.64	14.55	1.68	14.55	5.74	14.55	2.42	14.55	1.48	14.55	14.55	2.6	5.76	14.6	6.22	14.6	1.24	14.6	0.85	14.6	4.78	14.6	6.01	14.6
2.36	14.6	2.5	14.6	2.31	14.6	1.69	14.6	5.43	14.6	2.9	14.6	1.38	14.6	14.6	4.42	5.64	14.65	6.31	14.65	1.62	14.65	0.9	14.65	5.66	14.65	5.51	14.65
1.91	14.65	2.68	14.65	1.97	14.65	2	14.65	5.54	14.65	3.79	14.65	1.65	14.65	14.65	3.26	5.58	14.7	6.14	14.7	1.52	14.7	1.09	14.7	5.77	14.7	3.26	14.7
1.63	14.7	2.87	14.7	1.43	14.7	2.26	14.7	5.54	14.7	3.41	14.7	1.56	14.7	14.7	2.28	5.79	14.75	5.99	14.75	1.42	14.75	1.59	14.75	5.35	14.75	1.57	14.75
1.43	14.75	3.87	14.75	1.09	14.75	4.31	14.75	4.3	14.75	3.52	14.75	1.52	14.75	14.75	1.72	5.72	14.8	5.76	14.8	1.07	14.8	3.01	14.8	4.45	14.8	1.09	14.8
1.52	14.8	3.68	14.8	1.29	14.8	4.56	14.8	2.65	14.8	4.06	14.8	1.54	14.8	14.8	1.62	5.77	14.85	5.83	14.85	1.98	14.85	2.21	14.85	3.91	14.85	0.83	14.85
1.64	14.85	4.42	14.85	2.02	14.85	4.44	14.85	2.25	14.85	4.06	14.85	2.18	14.85	14.85	1.51	5.93	14.9	5.85	14.9	4.43	14.9	1.8	14.9	3.88	14.9	0.78	14.9
2.35	14.9	2.76	14.9	2.59	14.9	4.63	14.9	2.21	14.9	4.05	14.9	2.26	14.9	14.9	1.21	6.07	14.95	5.81	14.95	5.06	14.95	1.18	14.95	4.1	14.95	0.9	14.95
3.37	14.95	2.28	14.95	2.48	14.95	4.81	14.95	2.34	14.95	3.87	14.95	2.34	14.95	14.95	1.26	5.91	15	5.81	15	5.59	15	1.35	15	4.25	15	0.8	15
3.35	15	1.8	15	2.28	15	4.49	15	2.48	15	3.12	15	2.91	15	15	0.96	5.61	15.05	5.56	15.05	5.7	15.05	1.82	15.05	4.2	15.05	1.99	15.05
3.58	15.05	1.89	15.05	3.05	15.05	3.34	15.05	2.56	15.05	2.88	15.05	2.78	15.05	15.05	1.65	4.91	15.1	5.4	15.1	5.97	15.1	4.37	15.1	4.16	15.1	1.62	15.1
3.78	15.1	1.9	15.1	2.45	15.1	2.77	15.1	2.21	15.1	2.7	15.1	3.37	15.1	15.1	1.29	4.66	15.15	5.47	15.15	6.03	15.15	5.79	15.15	4.21	15.15	1	15.15
3.74	15.15	1.97	15.15	1.96	15.15	2.41	15.15	2.35	15.15	2.56	15.15	4.8	15.15	15.15	1.07	4.7	15.2	5.28	15.2	5.97	15.2	6.13	15.2	4.48	15.2	1.48	15.2
2.43	15.2	2.12	15.2	1.59	15.2	2.13	15.2	2.94	15.2	2.85	15.2	3.77	15.2	15.2	1.2	4.89	15.25	4.85	15.25	5.85	15.25	6.13	15.25	4.8	15.25	2.33	15.25
2.71	15.25	2.41	15.25	2.01	15.25	2.19	15.25	5.18	15.25	2.98	15.25	2.25	15.25	15.25	1.52	5.09	15.3	4.58	15.3	5.77	15.3	6.05	15.3	5.16	15.3	3.43	15.3
2.31	15.3	2.34	15.3	2.66	15.3	1.88	15.3	5.9	15.3	2.81	15.3	1.8	15.3	15.3	1.9	5.44	15.35	4.58	15.35	5.72	15.35	5.73	15.35	5.28	15.35	3.4	15.35
2.29	15.35	2.32	15.35	2.77	15.35	2.29	15.35	5.84	15.35	2.68	15.35	1.78	15.35	15.35	1.47	5.67	15.4	4.16	15.4	5.64	15.4	5.63	15.4	4.68	15.4	2.02	15.4
2.22	15.4	1.97	15.4	3.14	15.4	3.11	15.4	4.74	15.4	2.62	15.4	1.6	15.4	15.4	1.33	5.72	15.45	4.43	15.45	5.64	15.45	5.65	15.45	4.16	15.45	1.32	15.45
2.22	15.45	2.3	15.45	2.62	15.45	2.61	15.45	3.47	15.45	2.4	15.45	1.35	15.45	15.45	1.38	5.85	15.5	4.55	15.5	5.68	15.5	5.68	15.5	4.16	15.5	2.19	15.5
2.75	15.5	2.5	15.5	2.42	15.5	2.71	15.5	2.83	15.5	2.28	15.5	1.09	15.5	15.5	1.65	5.92	15.55	4.51	15.55	5.95	15.55	5.52	15.55	4.38	15.55	5.47	15.55
2.14	15.55	2.23	15.55	2.46	15.55	2.55	15.55	2.74	15.55	2.3	15.55	1.18	15.55	15.55	1.93	5.79	15.6	4.62	15.6	6.06	15.6	5.48	15.6	4.21	15.6	5.23	15.6
3.22	15.6	2.03	15.6	2.22	15.6	2.5	15.6	2.64	15.6	1.81	15.6	1.32	15.6	15.6	2.84	5.57	15.65	4.75	15.65	6.22	15.65	5.56	15.65	4.54	15.65	4.91	15.65
4.62	15.65	2.1	15.65	3.63	15.65	1.91	15.65	2.63	15.65	2.08	15.65	2.44	15.65	15.65	2.99	5.54	15.7	4.81	15.7	6.28	15.7	5.59	15.7	5.29	15.7	4.72	15.7
3.4	15.7	1.8	15.7	6.46	15.7	2.45	15.7	2.6	15.7	1.64	15.7	2.04	15.7	15.7	3.28	5.54	15.75	4.69	15.75	6.13	15.75	5.65	15.75	5.42	15.75	4.82	15.75
2.83	15.75	1.68	15.75	6.93	15.75	2.47	15.75	2.43	15.75	1.92	15.75	2.47	15.75	15.75	4.07	5.27	15.8	4.93	15.8	5.29	15.8	5.83	15.8	5.54	15.8	4.68	15.8
2.93	15.8	1.92	15.8	6.5	15.8	1.83	15.8	4.28	15.8	2.11	15.8	4.77	15.8	15.8	5.34	4.58	15.85	5.54	15.85	4.23	15.85	6.06	15.85	5.44	15.85	4.63	15.85
2.84	15.85	1.82	15.85	4.13	15.85	1.9	15.85	4.06	15.85	1.93	15.85	3.24	15.85	15.85	4.91	3.57	15.9	5.78	15.9	4	15.9	6.1	15.9	5.32	15.9	4.75	15.9
2.49	15.9	2.53	15.9	2.56	15.9	2.46	15.9	3.04	15.9	1.66	15.9	2.66	15.9	15.9	4.67	3.18	15.95	5.86	15.95	4.35	15.95	6.08	15.95	5.78	15.95	4.93	15.95
2.64	15.95	3.33	15.95	3.24	15.95	2.46	15.95	2.38	15.95	1.65	15.95	2.24	15.95	15.95	3.98	3.13	16	5.51	16	4.92	16	6.71	16	5.94	16	4.89	16
2.58	16	7.01	16	5.09	16	2.04	16	1.81	16	3.82	16	2.33	16	16	2.36	2.93	16.05	5.04	16.05	5.03	16.05	6.58	16.05	5.7	16.05	4.85	16.05
2.5	16.05	5.24	16.05	5.79	16.05	2.1	16.05	2.22	16.05	3.41	16.05	2.25	16.05	16.05	2.19	2.88	16.1	5.49	16.1	5.6	16.1	6.65	16.1	5.7	16.1	4.51	16.1
2.19	16.1	5.1	16.1	4.13	16.1	2.42	16.1	1.64	16.1	2.87	16.1	2.17	16.1	16.1	2.12	2.87	16.15	6.38	16.15	5.5	16.15	6.88	16.15	5.78	16.15	4.29	16.15
2.68	16.15	2.83	16.15	1.52	16.15	3.83	16.15	1.59	16.15	3	16.15	2.37	16.15	16.15	2.16	3.06	16.2	5.95	16.2	5.37	16.2	6.45	16.2	5.68	16.2	4.23	16.2
2.4	16.2	2.44	16.2	1.06	16.2	4.28	16.2	1.33	16.2	2.72	16.2	2.08	16.2	16.2	2.38	3.42	16.25	5.35	16.25	5.62	16.25	6.28	16.25	5.96	16.25	4.56	16.25
2.44	16.25	2.78	16.25	0.94	16.25	3.82	16.25	1.85	16.25	3.03	16.25	2.59	16.25	16.25	4.18	3.91	16.3	5.4	16.3	5.88	16.3	5.55	16.3	5.95	16.3	5.01	16.3
3.48	16.3	1.18	16.3	0.92	16.3	3.56	16.3	1.59	16.3	2.36	16.3	3.02	16.3	16.3	2.47	4.75	16.35	4.23	16.35	5.87	16.35	5.07	16.35	5.74	16.35	4.99	16.35
3.3	16.35	0.91	16.35	0.88	16.35	3.36	16.35	1.32	16.35	1.88	16.35	2.91	16.35	16.35	2.76	5.06	16.4	2.2	16.4	6.09	16.4	4.9	16.4	5.82	16.4	4.97	16.4
3.14	16.4	0.93	16.4	0.91	16.4	2.73	16.4	1.87	16.4	2.21	16.4	3.65	16.4	16.4	5.33	4.98	16.45	1.78	16.45	6.25	16.45	4.87	16.45	5.6	16.45	4.94	16.45
3.44	16.45	0.83	16.45	0.88	16.45	3.53	16.45	2.32	16.45	2.92	16.45	5.83	16.45	16.45	5.04	4.46	16.5	4.42	16.5	6.25	16.5	3.24	16.5	5.9	16.5	5.07	16.5
2.62	16.5	0.78	16.5	0.82	16.5	3.4	16.5	4.11	16.5	3.36	16.5	5.48	16.5	16.5	4.88	3.82	16.55	4.43	16.55	6.1	16.55	1.76	16.55	5.99	16.55	5.39	16.55
1.91	16.55	0.79	16.55	0.81	16.55	3.31	16.55	3.66	16.55	2.89	16.55	3.53	16.55	16.55	4.52	3.7	16.6	4.41	16.6	5.75	16.6	3.46	16.6	6.05	16.6	5.6	16.6
1.99	16.6	0.79	16.6	1.05	16.6	3.04	16.6	2.86	16.6	2.78	16.6	2.38	16.6	16.6	2.76	3.96	16.65	4.7	16.65	5.57	16.65	5.3	16.65	5.65	16.65	5.73	16.65
1.94	16.65	0.77	16.65	0.82	16.65	3.6	16.65	2.7	16.65	2.82	16.65	2.26	16.65	16.65	1.38	4.16	16.7	4.47	16.7	5.57	16.7	5.22	16.7	5.87	16.7	6.1	16.7
3.06	16.7	0.8	16.7	0.72	16.7	3.69	16.7	2.75	16.7	3.23	16.7	2.14	16.7	16.7	1.01	4.08	16.75	5.38	16.75	5.73	16.75	5.45	16.75	5.91	16.75	5.47	16.75
2.69	16.75	0.77	16.75	0.84	16.75	3.24	16.75	3.27	16.75	5.28	16.75	2.07	16.75	16.75	0.86	4.27	16.8	6.29	16.8	5.61	16.8	5.68	16.8	6.16	16.8	2.95	16.8
3	16.8	0.78	16.8	0.8	16.8	3	16.8	2.73	16.8	4.39	16.8	2.62	16.8	16.8	0.85	4.07	16.85	6.16	16.85	5.44	16.85	6.18	16.85	6.01	16.85	1.92	16.85
2.47	16.85	0.79	16.85	0.87	16.85	2.98	16.85	2.96	16.85	3.39	16.85	2.19	16.85	16.85	0.87	3.7	16.9	5.97	16.9	5.64	16.9	6.7	16.9	6.02	16.9	1.6	16.9
4.07	16.9	0.84	16.9	0.8	16.9	5.42	16.9	2.91	16.9	2.45	16.9	2.75	16.9	16.9	0.83	4.11	16.95	5.77	16.95	5.85	16.95	6.76	16.95	5.94	16.95	1.45	16.95
3.84	16.95	0.84	16.95	0.8	16.95	6.23	16.95	3.14	16.95	1.98	16.95	3.26	16.95	16.95	0.81	4.22	17	5.2	17	5.78	17	6.68	17	5.54	17	1.08	17
3.34	17	0.87	17	0.8	17	5.13	17	3.25	17	1.9	17	2.39	17	17	0.83	4.01	17.05	4.81	17.05	5.4	17.05	6.27	17.05	6.05	17.05	0.96	17.05
2.76	17.05	0.82	17.05	0.77	17.05	5.08	17.05	3.05	17.05	3.66	17.05	1.79	17.05	17.05	0.4	4.22	17.1	5	17.1	4.77	17.1	6.34	17.1	6.05	17.1	0.86	17.1
2.09	17.1	0.82	17.1	0.76	17.1	4.21	17.1	2.63	17.1	3.89	17.1	3.5	17.1	17.1	0.79	4.2	17.15	5.14	17.15	4.74	17.15	6.2	17.15	5.79	17.15	0.88	17.15
2.33	17.15	0.79	17.15	0.78	17.15	4.68	17.15	2.74	17.15	4	17.15	3.42	17.15	17.15	0.75	3.93	17.2	5.16	17.2	4.54	17.2	6.18	17.2	5.42	17.2	0.89	17.2
5.17	17.2	0.77	17.2	0.83	17.2	3.06	17.2	5.42	17.2	3.09	17.2	2.98	17.2	17.2	0.78	3.76	17.25	5.15	17.25	4.39	17.25	6.34	17.25	5.39	17.25	0.97	17.25
4.66	17.25	0.79	17.25	0.82	17.25	2.53	17.25	5.78	17.25	2.63	17.25	3.83	17.25	17.25	0.81	3.94	17.3	4.82	17.3	4.43	17.3	6.09	17.3	5.3	17.3	0.95	17.3
4.04	17.3	0.82	17.3	0.78	17.3	3.35	17.3	5.13	17.3	3.31	17.3	4.71	17.3	17.3	0.78	4.12	17.35	5.01	17.35	4.87	17.35	5.9	17.35	5.03	17.35	1.01	17.35
4.24	17.35	0.79	17.35	0.8	17.35	2.71	17.35	3.97	17.35	3.74	17.35	4.66	17.35	17.35	0.45	3.85	17.4	4.75	17.4	4.93	17.4	5.84	17.4	4.96	17.4	1.37	17.4
3	17.4	0.8	17.4	0.8	17.4	2.36	17.4	2.97	17.4	4.26	17.4	3.29	17.4	17.4	0.39	3.12	17.45	4.96	17.45	4.82	17.45	5.86	17.45	5.45	17.45	2.37	17.45
3.15	17.45	0.82	17.45	0.81	17.45	2.4	17.45	3.85	17.45	4.65	17.45	3.59	17.45	17.45	0.45	2.87	17.5	5.07	17.5	4.75	17.5	5.79	17.5	6.04	17.5	2.56	17.5
4	17.5	0.83	17.5	0.81	17.5	2.81	17.5	4.38	17.5	3.97	17.5	4.16	17.5	17.5	0.52	3.31	17.55	5.01	17.55	4.6	17.55	5.8	17.55	5.57	17.55	5	17.55
4.74	17.55	0.79	17.55	0.79	17.55	5.97	17.55	4.74	17.55	3.34	17.55	3.76	17.55	17.55	0.62	3.84	17.6	4.67	17.6	4.59	17.6	5.91	17.6	3.19	17.6	5.65	17.6
3.8	17.6	0.8	17.6	0.86	17.6	6.36	17.6	3.63	17.6	2.64	17.6	4.76	17.6	17.6	0.78	3.86	17.65	4.83	17.65	4.47	17.65	5.92	17.65	2.03	17.65	5.26	17.65
3.17	17.65	0.84	17.65	0.89	17.65	6.31	17.65	2.88	17.65	2.08	17.65	6.42	17.65	17.65	0.82	3.6	17.7	5.28	17.7	3.86	17.7	6.04	17.7	1.88	17.7	5.02	17.7
2.42	17.7	0.86	17.7	0.89	17.7	6.32	17.7	2.75	17.7	1.77	17.7	6.12	17.7	17.7	0.86	3.17	17.75	5.45	17.75	3.85	17.75	6.15	17.75	2.02	17.75	4.8	17.75
1.82	17.75	0.86	17.75	0.89	17.75	6.81	17.75	2.39	17.75	2.55	17.75	5	17.75	17.75	0.88	4.29	17.8	5.51	17.8	4.05	17.8	5.92	17.8	1.4	17.8	4.65	17.8
4.71	17.8	0.77	17.8	0.97	17.8	6.9	17.8	3.43	17.8	4.82	17.8	4.75	17.8	17.8	0.88	4.45	17.85	5.4	17.85	4.25	17.85	5.89	17.85	1.25	17.85	4.83	17.85
6.13	17.85	0.74	17.85	1.23	17.85	7.89	17.85	5.27	17.85	6.03	17.85	4.55	17.85	17.85	0.86	4.5	17.9	5.45	17.9	4.27	17.9	5.66	17.9	1.17	17.9	4.92	17.9
6.09	17.9	0.7	17.9	1.28	17.9	8.32	17.9	6.43	17.9	7.18	17.9	5.85	17.9	17.9	0.8	4.32	17.95	5.42	17.95	3.86	17.95	5.54	17.95	1.26	17.95	5.33	17.95
6.78	17.95	0.66	17.95	1.12	17.95	8.11	17.95	6.77	17.95	6.86	17.95	6.66	17.95	17.95	0.9	3.86	18	5.34	18	4.08	18	5.36	18	1.53	18	5.82	18
8.45	18	0.72	18	0.95	18	8.51	18	7.34	18	6.75	18	4.78	18	18	0.87	3.43	18.05	5.33	18.05	4.47	18.05	4.99	18.05	1.16	18.05	6.23	18.05
9.03	18.05	0.88	18.05	0.69	18.05	7.89	18.05	7.02	18.05	6.64	18.05	3.38	18.05	18.05	0.89	4.05	18.1	5.22	18.1	4.4	18.1	4.96	18.1	0.89	18.1	6.46	18.1
8.9	18.1	0.98	18.1	0.89	18.1	6.97	18.1	6.65	18.1	5.88	18.1	1.64	18.1	18.1	0.91	4.37	18.15	5.32	18.15	4.33	18.15	4.85	18.15	0.85	18.15	6.47	18.15
7.79	18.15	0.97	18.15	0.88	18.15	6.51	18.15	6.86	18.15	5.46	18.15	0.99	18.15	18.15	0.92	4.63	18.2	5.13	18.2	4.31	18.2	4.75	18.2	0.9	18.2	5.4	18.2
6.71	18.2	0.91	18.2	0.88	18.2	6.62	18.2	6.59	18.2	5.81	18.2	0.94	18.2	18.2	0.87	4.84	18.25	4.87	18.25	4.22	18.25	5.22	18.25	0.99	18.25	5.03	18.25
7.03	18.25	0.91	18.25	0.86	18.25	6.3	18.25	6.28	18.25	5.67	18.25	0.9	18.25	18.25	0.87	4.74	18.3	4.84	18.3	4.83	18.3	5.5	18.3	0.94	18.3	4.76	18.3
7.65	18.3	0.9	18.3	0.83	18.3	5.85	18.3	6.54	18.3	4.23	18.3	0.83	18.3	18.3	0.88	4.61	18.35	4.76	18.35	4.94	18.35	5.57	18.35	0.95	18.35	4.63	18.35
7.21	18.35	0.95	18.35	0.78	18.35	4.27	18.35	6.49	18.35	3.38	18.35	0.86	18.35	18.35	0.92	4.38	18.4	4.76	18.4	4.77	18.4	5.6	18.4	1.77	18.4	4.45	18.4
6.06	18.4	0.98	18.4	0.75	18.4	5.01	18.4	7.34	18.4	2.74	18.4	0.89	18.4	18.4	0.97	3.59	18.45	4.84	18.45	4.69	18.45	5.55	18.45	1.75	18.45	4.35	18.45
5.33	18.45	0.96	18.45	0.75	18.45	4.84	18.45	8.38	18.45	2.49	18.45	0.88	18.45	18.45	0.96	3.93	18.5	4.63	18.5	5.09	18.5	5.52	18.5	6.68	18.5	4.35	18.5
4.7	18.5	0.95	18.5	0.75	18.5	4.88	18.5	7.56	18.5	2.74	18.5	0.89	18.5	18.5	0.87	4.08	18.55	4.37	18.55	5.07	18.55	5.46	18.55	6.9	18.55	4.44	18.55
4.34	18.55	0.85	18.55	0.76	18.55	5.38	18.55	6.01	18.55	4.31	18.55	0.91	18.55	18.55	0.9	4.03	18.6	4.13	18.6	4.76	18.6	5.39	18.6	6.85	18.6	4.84	18.6
4.34	18.6	0.86	18.6	0.75	18.6	5.9	18.6	5.34	18.6	5.67	18.6	0.95	18.6	18.6	0.9	4.13	18.65	4.27	18.65	4.23	18.65	5.88	18.65	7.3	18.65	5.71	18.65
4.38	18.65	0.84	18.65	0.73	18.65	5.65	18.65	4.67	18.65	4.96	18.65	0.92	18.65	18.65	0.9	4.37	18.7	4.72	18.7	4.29	18.7	6.09	18.7	7.59	18.7	6.89	18.7
5.23	18.7	0.94	18.7	0.93	18.7	4.85	18.7	3.16	18.7	4.29	18.7	0.94	18.7	18.7	0.85	4.66	18.75	4.44	18.75	4.34	18.75	5.94	18.75	7.94	18.75	7.68	18.75
5.39	18.75	1.05	18.75	0.81	18.75	4.49	18.75	3.69	18.75	4.27	18.75	0.98	18.75	18.75	0.82	3.81	18.8	4.5	18.8	4.15	18.8	5.94	18.8	8.2	18.8	7.46	18.8
5.42	18.8	0.81	18.8	0.84	18.8	4.37	18.8	4.68	18.8	6.27	18.8	0.99	18.8	18.8	0.82	3.22	18.85	4.83	18.85	3.23	18.85	6.05	18.85	8.57	18.85	7.36	18.85
6.1	18.85	0.77	18.85	0.91	18.85	4.4	18.85	5.37	18.85	5.84	18.85	0.91	18.85	18.85	0.84	3.37	18.9	4.65	18.9	2.68	18.9	6.06	18.9	8.54	18.9	6.96	18.9
6	18.9	0.82	18.9	0.91	18.9	4.74	18.9	7.09	18.9	5.78	18.9	0.93	18.9	18.9	0.86	6.71	18.95	5.3	18.95	5.8	18.95	6.18	18.95	8.03	18.95	2.33	18.95
6.21	18.95	0.82	18.95	0.91	18.95	5.07	18.95	7.89	18.95	6.3	18.95	0.9	18.95	18.95	0.86	7.02	19	5.61	19	6.88	19	6.15	19	7.78	19	6.14	19
6.34	19	0.82	19	0.91	19	5	19	7.79	19	6.81	19	0.83	19	19	0.89	6.72	19.05	5.48	19.05	6.38	19.05	6.08	19.05	7.79	19.05	5.74	19.05
5.64	19.05	0.8	19.05	0.86	19.05	4.63	19.05	7.72	19.05	6.35	19.05	0.87	19.05	19.05	0.86	6.62	19.1	5.13	19.1	5.4	19.1	6.1	19.1	8.16	19.1	5.46	19.1
4.96	19.1	0.82	19.1	0.82	19.1	4.46	19.1	7.17	19.1	5.21	19.1	0.91	19.1	19.1	0.89	5.89	19.15	5.24	19.15	5.06	19.15	6.23	19.15	8.22	19.15	5.37	19.15
4.71	19.15	0.82	19.15	0.79	19.15	4.85	19.15	6.1	19.15	4.43	19.15	0.84	19.15	19.15	0.92	4.97	19.2	5.34	19.2	4.96	19.2	6.19	19.2	8.37	19.2	5.54	19.2
5.61	19.2	0.81	19.2	0.78	19.2	6.02	19.2	5.38	19.2	4.02	19.2	0.85	19.2	19.2	0.97	4.93	19.25	5.24	19.25	4.82	19.25	6.29	19.25	8.25	19.25	5.65	19.25
5.9	19.25	0.83	19.25	0.78	19.25	6.1	19.25	5.21	19.25	3.81	19.25	0.92	19.25	19.25	1.05	5.52	19.3	5.29	19.3	4.9	19.3	6.25	19.3	7.64	19.3	5.93	19.3
5.64	19.3	0.86	19.3	0.81	19.3	5.35	19.3	5.48	19.3	3.7	19.3	0.89	19.3	19.3	0.92	5.48	19.35	4.69	19.35	5.14	19.35	6.38	19.35	6.15	19.35	6.04	19.35
5.26	19.35	0.84	19.35	0.87	19.35	4.9	19.35	5.66	19.35	3.86	19.35	0.91	19.35	19.35	0.93	5.56	19.4	4.21	19.4	5.27	19.4	6.54	19.4	5.39	19.4	5.27	19.4
5.57	19.4	0.91	19.4	0.89	19.4	5.37	19.4	6.07	19.4	4.39	19.4	1.04	19.4	19.4	0.91	4.67	19.45	4.59	19.45	5.44	19.45	6.41	19.45	5.07	19.45	4.25	19.45
5.38	19.45	1.08	19.45	0.81	19.45	5.59	19.45	7.36	19.45	3.78	19.45	0.94	19.45	19.45	0.9	2.59	19.5	3.01	19.5	5.75	19.5	6.39	19.5	4.93	19.5	5.44	19.5
5.59	19.5	1.12	19.5	0.77	19.5	5.12	19.5	7.53	19.5	3.22	19.5	1.08	19.5	19.5	0.88	1.84	19.55	2.48	19.55	6.32	19.55	6.37	19.55	4.82	19.55	5.7	19.55
5.73	19.55	1.02	19.55	0.82	19.55	4.09	19.55	6.7	19.55	4.21	19.55	1.34	19.55	19.55	0.87	1.84	19.6	1.67	19.6	6.88	19.6	6.15	19.6	4.76	19.6	5.92	19.6
5.57	19.6	0.93	19.6	0.77	19.6	3.86	19.6	5.87	19.6	4.02	19.6	1.53	19.6	19.6	0.91	1.74	19.65	1.58	19.65	7.09	19.65	6.02	19.65	4.8	19.65	6.23	19.65
5.31	19.65	0.92	19.65	0.75	19.65	2.77	19.65	5.73	19.65	3.78	19.65	1.33	19.65	19.65	0.95	1.58	19.7	1.64	19.7	6.89	19.7	6.21	19.7	4.89	19.7	6.67	19.7
5.23	19.7	0.94	19.7	0.85	19.7	1.63	19.7	5.97	19.7	3.81	19.7	1.02	19.7	19.7	0.99	1.41	19.75	1.64	19.75	4.28	19.75	6.38	19.75	5.03	19.75	6.57	19.75
5.58	19.75	0.93	19.75	0.84	19.75	3.96	19.75	5.32	19.75	3.17	19.75	0.99	19.75	19.75	0.98	1.23	19.8	1.26	19.8	3.16	19.8	6.48	19.8	5.23	19.8	5.39	19.8
7.54	19.8	0.91	19.8	0.86	19.8	6.39	19.8	4.89	19.8	3.11	19.8	1.08	19.8	19.8	0.95	1.27	19.85	1.47	19.85	3.43	19.85	6.49	19.85	5.67	19.85	3.88	19.85
9.5	19.85	0.88	19.85	0.91	19.85	7.03	19.85	4.8	19.85	3.1	19.85	1.21	19.85	19.85	0.92	1.59	19.9	1.48	19.9	2.41	19.9	6.32	19.9	6.26	19.9	2.79	19.9
9.21	19.9	0.85	19.9	0.85	19.9	7.07	19.9	5.04	19.9	4.12	19.9	1.18	19.9	19.9	0.89	1.65	19.95	1.29	19.95	1.69	19.95	6.28	19.95	6.75	19.95	2.32	19.95
8.73	19.95	0.94	19.95	0.84	19.95	7.39	19.95	5.38	19.95	4.96	19.95	0.99	19.95	19.95	1.02	2.04	20	1.13	20	2.03	20	6.22	20	7.26	20	2.14	20
8.69	20	1	20	0.86	20	8.31	20	5.74	20	5.23	20	0.96	20	20	1.08	2.33	20.05	2.01	20.05	2.59	20.05	6.26	20.05	7.34	20.05	2.48	20.05
7.97	20.05	0.97	20.05	1.03	20.05	8.63	20.05	5.59	20.05	6.22	20.05	1	20.05	20.05	1.28	2.16	20.1	6.95	20.1	2.06	20.1	6.4	20.1	7.41	20.1	1.7	20.1
7.93	20.1	0.85	20.1	0.88	20.1	8.6	20.1	6.39	20.1	5.93	20.1	0.93	20.1	20.1	0.96	2.26	20.15	7.24	20.15	1.49	20.15	6.93	20.15	7.47	20.15	1.58	20.15
8.76	20.15	0.86	20.15	0.87	20.15	7.96	20.15	7.81	20.15	5.57	20.15	1.15	20.15	20.15	0.92	1.94	20.2	7.1	20.2	1.34	20.2	7.09	20.2	7.48	20.2	2.03	20.2
8.3	20.2	0.89	20.2	0.89	20.2	6.9	20.2	7.73	20.2	5.25	20.2	1	20.2	20.2	1.03	1.46	20.25	7.52	20.25	1.32	20.25	4.13	20.25	7.45	20.25	1.77	20.25
9.19	20.25	0.91	20.25	0.9	20.25	5.85	20.25	7.68	20.25	4.77	20.25	0.96	20.25	20.25	0.92	1.42	20.3	7.96	20.3	1.28	20.3	2.36	20.3	6.7	20.3	1.37	20.3
9.1	20.3	0.92	20.3	0.95	20.3	7.65	20.3	6.8	20.3	4.54	20.3	0.97	20.3	20.3	0.89	1.61	20.35	8.06	20.35	1.3	20.35	1.74	20.35	3.85	20.35	1.46	20.35
8.88	20.35	0.92	20.35	0.96	20.35	7.89	20.35	8.31	20.35	4.1	20.35	0.98	20.35	20.35	1.1	2.35	20.4	7.5	20.4	1.51	20.4	1.33	20.4	2.53	20.4	2.25	20.4
8.03	20.4	0.95	20.4	1.04	20.4	7.83	20.4	9.83	20.4	2.53	20.4	0.92	20.4	20.4	0.91	1.59	20.45	7.22	20.45	1.74	20.45	2.01	20.45	1.64	20.45	1.59	20.45
7.88	20.45	0.96	20.45	0.89	20.45	7.77	20.45	9.18	20.45	1.87	20.45	0.91	20.45	20.45	0.87	1.31	20.5	7.83	20.5	1.6	20.5	3.14	20.5	1.33	20.5	2.09	20.5
9.03	20.5	0.96	20.5	0.9	20.5	8.29	20.5	8.33	20.5	1.1	20.5	0.93	20.5	20.5	0.87	1.3	20.55	7.37	20.55	2.21	20.55	2.3	20.55	1.01	20.55	2.28	20.55
8.88	20.55	0.97	20.55	0.87	20.55	8.94	20.55	7.68	20.55	1.72	20.55	0.94	20.55	20.55	0.87	4.34	20.6	8.09	20.6	1.76	20.6	2.88	20.6	1.03	20.6	1.29	20.6
7.4	20.6	2.79	20.6	0.89	20.6	9.73	20.6	7.14	20.6	2.09	20.6	0.93	20.6	20.6	0.9	8	20.65	9.34	20.65	1.53	20.65	3.75	20.65	1.14	20.65	4.08	20.65
6.3	20.65	1.46	20.65	0.85	20.65	10.17	20.65	6.95	20.65	5.88	20.65	0.91	20.65	20.65	0.89	8.22	20.7	8.55	20.7	1.47	20.7	2.59	20.7	1.66	20.7	8	20.7
5.81	20.7	0.98	20.7	0.87	20.7	11.05	20.7	7.04	20.7	7.48	20.7	0.98	20.7	20.7	0.89	8.19	20.75	7.25	20.75	1.35	20.75	1.48	20.75	1.43	20.75	7.96	20.75
5.46	20.75	0.93	20.75	0.97	20.75	11.72	20.75	7.35	20.75	8.16	20.75	0.97	20.75	20.75	0.88	7.54	20.8	6.95	20.8	1.36	20.8	1.56	20.8	1.62	20.8	7.22	20.8
5.4	20.8	0.95	20.8	0.98	20.8	11.67	20.8	7.28	20.8	8.68	20.8	1.01	20.8	20.8	0.93	9.05	20.85	7.03	20.85	1.35	20.85	6.67	20.85	1.73	20.85	6.5	20.85
5.76	20.85	1	20.85	0.93	20.85	11.4	20.85	7.42	20.85	8.78	20.85	0.94	20.85	20.85	0.94	8.21	20.9	6.58	20.9	1.28	20.9	7.35	20.9	2.6	20.9	5.84	20.9
6.44	20.9	0.99	20.9	0.92	20.9	10.51	20.9	7.02	20.9	8.59	20.9	0.94	20.9	20.9	0.94	5.93	20.95	5.84	20.95	1.11	20.95	7.85	20.95	2.11	20.95	6.21	20.95
7.01	20.95	1.14	20.95	0.93	20.95	8.22	20.95	6.71	20.95	8.39	20.95	0.98	20.95	20.95	0.91	7.09	21	5.51	21	2.52	21	8.91	21	1.96	21	6.42	21
7.41	21	1	21	0.89	21	4.79	21	7.55	21	7.98	21	0.99	21	21	1	6.78	21.05	5.02	21.05	5.76	21.05	9.84	21.05	3.88	21.05	6.05	21.05
4.64	21.05	1.04	21.05	0.88	21.05	6.82	21.05	6.8	21.05	7.1	21.05	1.02	21.05	21.65	1.01	3.69	21.1	4.02	21.1	7.67	21.1	10.79	21.1	7.01	21.1	5.86	21.1
7.41	21.1	1.07	21.1	0.85	21.1	8.2	21.1	8.1	21.1	5.4	21.1	0.96	21.1	21.7	1.01	3.77	21.15	3.41	21.15	9	21.15	10.75	21.15	7.67	21.15	5.84	21.15
7.82	21.15	0.98	21.15	0.86	21.15	7.76	21.15	8.23	21.15	6.97	21.15	1.09	21.15	21.75	1.04	6.15	21.2	4.01	21.2	10.78	21.2	11.13	21.2	7.99	21.2	5.83	21.2
8.4	21.2	0.97	21.2	0.74	21.2	7.51	21.2	8.85	21.2	6.41	21.2	1	21.2	21.8	0.98	7.47	21.25	4.39	21.25	11.04	21.25	11.73	21.25	6.94	21.25	5.99	21.25
9.22	21.25	0.95	21.25	0.75	21.25	7.3	21.25	10.11	21.25	5.74	21.25	1.04	21.25	21.85	0.94	9.41	21.3	4.38	21.3	9.96	21.3	11.06	21.3	6.66	21.3	6.24	21.3
10.03	21.3	0.93	21.3	0.85	21.3	7.41	21.3	11.84	21.3	5.44	21.3	1.03	21.3	21.9	0.98	13.41	21.35	4.4	21.35	8.61	21.35	10.21	21.35	6.85	21.35	6.5	21.35
9.91	21.35	0.94	21.35	0.9	21.35	7.81	21.35	14.06	21.35	5.21	21.35	1	21.35	21.95	1	15.26	21.4	4.77	21.4	8.32	21.4	8.25	21.4	6.48	21.4	6.76	21.4
9.4	21.4	0.95	21.4	0.87	21.4	7.76	21.4	14.92	21.4	5.3	21.4	0.97	21.4	22	1.01	13.94	21.45	5.73	21.45	7.56	21.45	6.57	21.45	6.47	21.45	7.54	21.45
9.84	21.45	0.99	21.45	0.82	21.45	8.19	21.45	15.02	21.45	6.26	21.45	1.05	21.45	22.05	1.01	11.6	21.5	6.25	21.5	7.21	21.5	5.65	21.5	6.32	21.5	8.28	21.5
9.74	21.5	0.97	21.5	0.92	21.5	8.58	21.5	14.14	21.5	8.3	21.5	1.04	21.5	22.1	1.02	8.71	21.55	6.82	21.55	6.18	21.55	5.35	21.55	5.68	21.55	7.9	21.55
9.53	21.55	0.98	21.55	0.98	21.55	8.75	21.55	12.86	21.55	9.68	21.55	0.97	21.55	22.15	1.04	7.28	21.6	6.95	21.6	5.92	21.6	5.06	21.6	5.24	21.6	7.83	21.6
8.77	21.6	0.99	21.6	0.87	21.6	8.85	21.6	11.78	21.6	10.71	21.6	1.03	21.6	22.2	1.15	7.18	21.65	6.88	21.65	6.3	21.65	4.93	21.65	4.82	21.65	9.42	21.65
8.05	21.65	0.97	21.65	0.82	21.65	8.75	21.65	12.07	21.65	10.4	21.65	1.05	21.65	22.25	1.02	7.4	21.7	7.03	21.7	6.83	21.7	4.83	21.7	5.49	21.7	8.73	21.7
10.03	21.7	0.99	21.7	0.85	21.7	7.79	21.7	10.8	21.7	9.2	21.7	1.03	21.7	22.3	1.01	6.71	21.75	7.35	21.75	6.7	21.75	4.86	21.75	7.11	21.75	8.53	21.75
10.68	21.75	0.98	21.75	0.95	21.75	7.27	21.75	8.84	21.75	7.3	21.75	1.09	21.75	22.35	1.03	8.03	21.8	7.29	21.8	6.02	21.8	4.79	21.8	6.84	21.8	7.48	21.8
9.96	21.8	0.95	21.8	0.93	21.8	6.69	21.8	8.18	21.8	6.27	21.8	0.97	21.8	22.4	1.01	10.29	21.85	7.01	21.85	4.13	21.85	5.13	21.85	6	21.85	7.03	21.85
10.49	21.85	0.95	21.85	0.89	21.85	4.83	21.85	8.09	21.85	7.85	21.85	0.93	21.85	22.45	1.03	9.3	21.9	6.66	21.9	2.34	21.9	5.6	21.9	6.15	21.9	8.04	21.9
11.06	21.9	0.94	21.9	0.88	21.9	3.66	21.9	8.5	21.9	10.75	21.9	0.9	21.9	22.5	0.97	7.98	21.95	6.47	21.95	3.82	21.95	6.67	21.95	6.54	21.95	9.06	21.95
11.86	21.95	0.96	21.95	0.91	21.95	3.01	21.95	8.44	21.95	11.14	21.95	0.83	21.95	22.55	0.91	7.5	22	6.51	22	6.56	22	7.35	22	6.45	22	7.54	22
10.37	22	0.99	22	0.94	22	3.34	22	7.55	22	10.73	22	0.78	22	22.6	0.94	6.21	22.05	7	22.05	4.38	22.05	6.69	22.05	5	22.05	6.8	22.05
4.28	22.05	1	22.05	0.94	22.05	5.15	22.05	6.81	22.05	10.22	22.05	1.05	22.05	22.65	1.03	7.38	22.1	7.67	22.1	7.29	22.1	6.56	22.1	5.57	22.1	6.69	22.1
5.51	22.1	0.97	22.1	0.97	22.1	7.1	22.1	7.23	22.1	9.67	22.1	1.11	22.1	22.7	1.05	7.2	22.15	7.83	22.15	7.86	22.15	6.48	22.15	5.25	22.15	6.77	22.15
3.4	22.15	1	22.15	0.95	22.15	8.21	22.15	7.73	22.15	9.71	22.15	0.96	22.15	22.75	1.08	7.21	22.2	8.01	22.2	8.18	22.2	7.41	22.2	5.37	22.2	6.41	22.2
3.14	22.2	0.95	22.2	0.97	22.2	7.09	22.2	8.62	22.2	9.7	22.2	0.98	22.2	22.8	1.06	10.81	22.25	8.24	22.25	8.43	22.25	8.53	22.25	4.93	22.25	7.15	22.25
2.81	22.25	0.99	22.25	0.94	22.25	6.53	22.25	8.87	22.25	8.47	22.25	1.65	22.25	22.85	1.08	11.64	22.3	8.48	22.3	8.7	22.3	9.27	22.3	5.07	22.3	6.91	22.3
1.86	22.3	1.07	22.3	0.94	22.3	4.81	22.3	9.21	22.3	8.55	22.3	1.66	22.3	22.9	1.16	11.77	22.35	8.63	22.35	9.15	22.35	10.35	22.35	6.65	22.35	6.6	22.35
4.68	22.35	1.06	22.35	0.94	22.35	6.04	22.35	9.18	22.35	8.81	22.35	2.16	22.35	22.95	1.21	11.1	22.4	8.68	22.4	9.37	22.4	8.83	22.4	7.49	22.4	6.32	22.4
4.68	22.4	0.96	22.4	0.93	22.4	5.34	22.4	6.66	22.4	9.03	22.4	2.04	22.4	23	1.3	10.58	22.45	8.29	22.45	9.67	22.45	7.41	22.45	6.62	22.45	5.96	22.45
5.14	22.45	0.94	22.45	0.99	22.45	6.93	22.45	3.61	22.45	8.68	22.45	1.26	22.45	23.05	1.36	9.8	22.5	8.31	22.5	9.69	22.5	6.56	22.5	6.19	22.5	5.57	22.5
7.19	22.5	0.98	22.5	1	22.5	7.47	22.5	3.02	22.5	7.17	22.5	1.5	22.5	23.1	1.27	10.42	22.55	4.25	22.55	9.11	22.55	5.82	22.55	6.36	22.55	5.54	22.55
7.62	22.55	0.96	22.55	0.97	22.55	8.06	22.55	2.78	22.55	6.25	22.55	1.37	22.55	23.15	1.3	9.12	22.6	8.48	22.6	7.75	22.6	5.58	22.6	6.65	22.6	5.8	22.6
6.69	22.6	1.01	22.6	0.96	22.6	8.54	22.6	2.83	22.6	7.22	22.6	1.44	22.6	23.2	1.42	8.11	22.65	8.79	22.65	8.29	22.65	4.4	22.65	7.17	22.65	5.64	22.65
4.08	22.65	1.25	22.65	1.03	22.65	8.96	22.65	4.03	22.65	7.25	22.65	1.62	22.65	23.25	1.47	6.74	22.7	8.16	22.7	9.67	22.7	3.25	22.7	7.71	22.7	5.3	22.7
3.13	22.7	3.71	22.7	1.1	22.7	8.36	22.7	4.71	22.7	7.01	22.7	1.88	22.7	23.3	1.64	8.75	22.75	5.26	22.75	9.81	22.75	3.3	22.75	7.72	22.75	5.33	22.75
2.57	22.75	0.85	22.75	1.04	22.75	7.45	22.75	6.31	22.75	6	22.75	2.74	22.75	23.35	1.53	8.92	22.8	4.17	22.8	8.69	22.8	4.54	22.8	7.33	22.8	5.44	22.8
2.25	22.8	0.87	22.8	1.16	22.8	8.52	22.8	3.33	22.8	4.54	22.8	1.45	22.8	23.4	1.24	7.75	22.85	4.57	22.85	8.15	22.85	5.46	22.85	6.95	22.85	5.45	22.85
2.52	22.85	1.02	22.85	1.23	22.85	9.09	22.85	3.88	22.85	3.29	22.85	1.05	22.85	23.45	1.05	7.23	22.9	5.1	22.9	7.48	22.9	5.7	22.9	6.73	22.9	5.25	22.9
2.78	22.9	1.05	22.9	1.15	22.9	9.68	22.9	5.8	22.9	2.95	22.9	0.99	22.9	23.5	1.13	7.22	22.95	4.7	22.95	5.3	22.95	6.48	22.95	7.15	22.95	5.57	22.95
6.8	22.95	1.15	22.95	1.11	22.95	9.35	22.95	7.04	22.95	2.3	22.95	1	22.95	23.55	1.28	7.52	23	2.91	23	2.91	23	7.39	23	7.83	23	6.81	23
7.69	23	1.26	23	1.25	23	8.99	23	8.25	23	2.07	23	1	23	23.6	1.33	7.81	23.05	1.9	23.05	0.82	23.05	7.68	23.05	7.44	23.05	7.97	23.05
7.57	23.05	1.22	23.05	1.38	23.05	8.72	23.05	8.13	23.05	2.26	23.05	--		23.65	1.34	8.34	23.1	4.88	23.1	2.21	23.1	7.19	23.1	7.12	23.1	8.2	23.1
7.4	23.1	1.27	23.1	1.28	23.1	8.45	23.1	8.4	23.1	1.34	23.1	--		23.7	0.98	8.5	23.15	5.94	23.15	1.83	23.15	7.1	23.15	6.03	23.15	8.29	23.15
7.23	23.15	1.1	23.15	1.15	23.15	8.11	23.15	8.39	23.15	1.88	23.15	--		23.75	0.91	8.9	23.2	5.97	23.2	4.05	23.2	6.43	23.2	4.17	23.2	7.94	23.2
7.52	23.2	1.27	23.2	1	23.2	7.52	23.2	7.46	23.2	3.26	23.2	--		23.8	1.02	5.34	23.25	6	23.25	6.42	23.25	7.55	23.25	3.98	23.25	7.55	23.25
7.84	23.25	1.39	23.25	1.83	23.25	7.1	23.25	7.91	23.25	4.87	23.25	--		23.85	1.07	8.73	23.3	6.08	23.3	5.96	23.3	7.83	23.3	4.03	23.3	7.15	23.3
7.86	23.3	2.52	23.3	1.86	23.3	7.75	23.3	8.33	23.3	4.44	23.3	--		23.9	2.21	8.02	23.35	6.06	23.35	5.66	23.35	7.9	23.35	3.64	23.35	7.3	23.35
7.46	23.35	1.23	23.35	1.2	23.35	8.68	23.35	8.09	23.35	2.3	23.35		--	23.95	4.04	7.63	23.4	6.21	23.4	6.5	23.4	7.43	23.4	3.39	23.4	9.95	23.4
7.52	23.4	0.95	23.4	1.26	23.4	9.05	23.4	8.63	23.4	1.39	23.4		--	24	5.08	7.24	23.45	7.19	23.45	6.98	23.45	5.07	23.45	4.4	23.45	11.31	23.45
7.81	23.45	1.01	23.45	1.2	23.45	9.25	23.45	8.89	23.45	1.51	23.45		--	24.05	2.63	6.88	23.5	8.59	23.5	7.52	23.5	3.83	23.5	4.92	23.5	10.73	23.5
7.7	23.5	1.09	23.5	0.99	23.5	9.79	23.5	9.55	23.5	1.57	23.5		--	24.1	1.36	7.08	23.55	9.1	23.55	8.18	23.55	3	23.55	6.11	23.55	9.96	23.55
7.48	23.55	1.06	23.55	1.19	23.55	9.87	23.55	9.78	23.55	1.95	23.55		--	24.15	1.32	7.88	23.6	9.26	23.6	8.03	23.6	1.79	23.6	7.57	23.6	10.24	23.6
7.36	23.6	1.63	23.6	1.61	23.6	8.75	23.6	9.68	23.6	1.53	23.6		--	24.2	1.25	8.56	23.65	10.76	23.65	8.03	23.65	2.31	23.65	9.01	23.65	8.99	23.65
7.2	23.65	1.34	23.65	1.33	23.65	7.42	23.65	9.35	23.65	1.3	23.65		--	24.25	1.05	7.51	23.7	12.41	23.7	8.7	23.7	3.36	23.7	8.85	23.7	4.76	23.7
8.19	23.7	1.72	23.7	1.06	23.7	7.57	23.7	9.03	23.7	1.21	23.7		--	24.3	1.09	6.87	23.75	12.67	23.75	8.47	23.75	4.53	23.75	8.09	23.75	2.49	23.75
8.73	23.75	1.14	23.75	1.44	23.75	8.5	23.75	8.65	23.75	1.61	23.75		--	24.35	1.16	6.84	23.8	10.87	23.8	7.61	23.8	5.75	23.8	7.63	23.8	1.86	23.8
9.24	23.8	1.08	23.8	1.02	23.8	8.89	23.8	8.25	23.8	2.18	23.8		--	24.4	1.05	6.82	23.85	9.76	23.85	7.24	23.85	7.77	23.85	7.17	23.85	1.77	23.85
9.81	23.85	1.17	23.85	0.95	23.85	10.05	23.85	8.42	23.85	1.54	23.85		--	24.45	2.17	5.38	23.9	9.49	23.9	7.05	23.9	7.88	23.9	6.17	23.9	1.88	23.9
9.48	23.9	1.11	23.9	0.98	23.9	11.57	23.9	9.45	23.9	1.06	23.9		--	24.5	2.22	7.24	23.95	9.53	23.95	6.9	23.95	5.64	23.95	5.8	23.95	6.95	23.95
9.04	23.95	1.09	23.95	1.51	23.95	11.63	23.95	9.65	23.95	1.51	23.95		--	24.55	1.4	8.11	24	9.52	24	6.76	24	3.98	24	4.24	24	7.71	24
8.92	24	1.24	24	1.1	24	11.11	24	10.14	24	2.28	24		--	24.6	1.03	8.51	24.05	9.54	24.05	1.86	24.05	2.44	24.05	3.07	24.05	6.94	24.05
8.76	24.05	1.54	24.05	1.71	24.05	10.39	24.05	9.1	24.05	3.61	24.05		--	24.65	1.29	9.93	24.1	9.71	24.1	6.39	24.1	3.9	24.1	2.29	24.1	5.07	24.1
8.72	24.1	1.57	24.1	1.7	24.1	9.55	24.1	11.19	24.1	1.96	24.1		--	24.7	2.38	11.1	24.15	10.46	24.15	6.32	24.15	4.24	24.15	3.58	24.15	4.51	24.15
8.06	24.15	1.13	24.15	3.33	24.15	8.49	24.15	10.54	24.15	1.47	24.15		--	24.75	2.46	11.52	24.2	11.44	24.2	6.15	24.2	3.26	24.2	4.37	24.2	4.25	24.2
7.35	24.2	2.03	24.2	1.78	24.2	7.44	24.2	8.66	24.2	1.6	24.2		--	24.8	1.83	11.55	24.25	11.49	24.25	6.23	24.25	3.17	24.25	3.38	24.25	3.94	24.25
9.05	24.25	1.9	24.25	1.1	24.25	6.97	24.25	3.9	24.25	1.86	24.25		--	24.85	1.27	10.78	24.3	10.05	24.3	6.34	24.3	4.26	24.3	3.05	24.3	6.33	24.3
9.4	24.3	1.68	24.3	1.08	24.3	7.61	24.3	2.28	24.3	1.38	24.3		--	24.9	1.16	8.18	24.35	8.8	24.35	6.56	24.35	4.7	24.35	4.21	24.35	6.96	24.35
8.9	24.35	1.45	24.35	1.05	24.35	9.88	24.35	2.4	24.35	1.25	24.35		--	24.95	0.99	6.83	24.4	7.7	24.4	6.82	24.4	5.22	24.4	4.95	24.4	9.39	24.4
8.08	24.4	1.2	24.4	1.77	24.4	9.33	24.4	3.71	24.4	3.52	24.4		--	25	1.43	6.32	24.45	7.88	24.45	7.36	24.45	8.44	24.45	5.54	24.45	11.26	24.45
7.49	24.45	2.19	24.45	1.56	24.45	11.36	24.45	2.16	24.45	3.18	24.45		--	25.05	2.28	6.04	24.5	8.45	24.5	8	24.5	8.05	24.5	6.56	24.5	11.61	24.5
8.75	24.5	1.86	24.5	1.09	24.5	12.23	24.5	2.15	24.5	1.85	24.5		--	25.1	3.35	6.04	24.55	8.42	24.55	8.58	24.55	9.25	24.55	7.28	24.55	11.46	24.55
10.28	24.55	1.76	24.55	1.06	24.55	13.16	24.55	2.2	24.55	1.3	24.55		--	25.15	3.27	6.11	24.6	7.6	24.6	7.6	24.6	10.86	24.6	8.33	24.6	10.64	24.6
10.84	24.6	5.02	24.6	1.77	24.6	13.64	24.6	1.91	24.6	1.99	24.6		--	25.2	6.22	6.05	24.65	2.11	24.65	6.81	24.65	12.14	24.65	9.37	24.65	9.54	24.65
10.01	24.65	4.39	24.65	1.74	24.65	12.95	24.65	2.64	24.65	2.22	24.65			25.25	5.45	6.04	24.7	7.22	24.7	6.49	24.7	11.84	24.7	8.84	24.7	9.03	24.7
10.47	24.7	3.02	24.7	2.66	24.7	11.32	24.7	2.93	24.7	1.8	24.7			25.3	2.63	6.12	24.75	7.27	24.75	6.48	24.75	10.03	24.75	5.18	24.75	8.74	24.75
10.38	24.75	4.82	24.75	3.59	24.75	9.27	24.75	3.6	24.75	1.16	24.75			25.35	2.35	6.09	24.8	7.13	24.8	6.34	24.8	9.25	24.8	2.58	24.8	8.77	24.8
9.76	24.8	3.24	24.8	3.73	24.8	8.65	24.8	2.3	24.8	1.12	24.8			25.4	1.49	6.08	24.85	6.71	24.85	6.37	24.85	9.03	24.85	2.07	24.85	8.94	24.85
7.73	24.85	2.4	24.85	5.19	24.85	9.65	24.85	1.78	24.85	1.22	24.85			25.45	1.23	6.11	24.9	6.93	24.9	6.48	24.9	8.91	24.9	2.18	24.9	8.31	24.9
5.14	24.9	1.22	24.9	5.83	24.9	11.57	24.9	3.22	24.9	1.35	24.9			25.5	2.61	6.2	24.95	6.82	24.95	6.37	24.95	9.04	24.95	1.8	24.95	8.07	24.95
3.49	24.95	1.47	24.95	3.86	24.95	11.86	24.95	5.13	24.95	1.34	24.95			25.55	3.02	6.22	25	6.64	25	6.08	25	9.62	25	1.82	25	8.28	25
3.21	25	1.18	25	3.22	25	10.99	25	3.74	25	1.05	25			25.6	3.86	6.11	25.05	6.53	25.05	1.49	25.05	9.81	25.05	4.92	25.05	7.86	25.05
2.56	25.05	2.24	25.05	3.23	25.05	10.36	25.05	3.65	25.05	1.23	25.05			25.65	4.63	6.35	25.1	6.52	25.1	5.68	25.1	9.46	25.1	9.14	25.1	8.81	25.1
4.61	25.1	2.62	25.1	1.99	25.1	10.44	25.1	3.02	25.1	1.48	25.1			25.7	3.43	6.45	25.15	6.56	25.15	5.91	25.15	8.04	25.15	10.08	25.15	8.59	25.15
4.67	25.15	2.28	25.15	1.83	25.15	10.74	25.15	2.25	25.15	1.37	25.15			25.75	2.07	6.7	25.2	6.89	25.2	6.05	25.2	7.47	25.2	9.55	25.2	7.58	25.2
3.56	25.2	1.52	25.2	3.22	25.2	10.52	25.2	1.8	25.2	1.57	25.2			25.8	1.53	7.14	25.25	7.03	25.25	6	25.25	7.33	25.25	10.95	25.25	7.45	25.25
4.44	25.25	1.31	25.25	2.46	25.25	8.61	25.25	2.42	25.25	2.02	25.25			25.85	4.18	7.94	25.3	6.9	25.3	6.12	25.3	7.8	25.3	11.7	25.3	7.99	25.3
2.82	25.3	1.26	25.3	2.42	25.3	5.9	25.3	2.27	25.3	1.43	25.3			25.9	3.29	9.07	25.35	7.11	25.35	6.47	25.35	8.91	25.35	11.79	25.35	8.65	25.35
2.46	25.35	1.22	25.35	3.24	25.35	3.56	25.35	1.89	25.35	2.25	25.35			25.95	1.79	9.11	25.4	7.01	25.4	7.03	25.4	11.19	25.4	11.48	25.4	8.3	25.4
2.56	25.4	1.24	25.4	2.24	25.4	2.53	25.4	1.3	25.4	1.33	25.4			26	1.22	9.09	25.45	6.94	25.45	7.91	25.45	12.5	25.45	11.83	25.45	7.7	25.45
3.87	25.45	1.32	25.45	1.41	25.45	2.75	25.45	1.44	25.45	2.14	25.45			26.05	1.56	8.89	25.5	7.49	25.5	8.95	25.5	13.01	25.5	11.82	25.5	7.56	25.5
4.57	25.5	1.43	25.5	4.59	25.5	1.97	25.5	1.41	25.5	2.72	25.5			26.1	1.33	8.57	25.55	8.53	25.55	9.72	25.55	10.74	25.55	10.01	25.55	7.48	25.55
5.23	25.55	3.12	25.55	4.93	25.55	1.91	25.55	1.26	25.55	2.64	25.55			26.15	1.78	8.31	25.6	8.79	25.6	8.82	25.6	7.68	25.6	9.36	25.6	7.63	25.6
4.51	25.6	3.5	25.6	2.51	25.6	2.07	25.6	1.17	25.6	2.33	25.6			26.2	1.86	8.25	25.65	7.59	25.65	7.49	25.65	6.74	25.65	9.42	25.65	7.87	25.65
3.93	25.65	2.58	25.65	1.46	25.65	1.8	25.65	1.37	25.65	2.18	25.65			26.25	1.84	8.31	25.7	7.06	25.7	7.14	25.7	6.42	25.7	9.22	25.7	7.95	25.7
4.63	25.7	1.51	25.7	1.34	25.7	1.57	25.7	1.29	25.7	2.23	25.7			26.3	2.27	8.41	25.75	6.77	25.75	7.28	25.75	6.65	25.75	9.96	25.75	8.13	25.75
4.88	25.75	2.89	25.75	2.56	25.75	1.52	25.75	2.22	25.75	1.76	25.75			26.35	6.01	8.44	25.8	6.53	25.8	7.71	25.8	7.32	25.8	11.27	25.8	8.22	25.8
4.27	25.8	2	25.8	2.09	25.8	1.81	25.8	4.76	25.8	1.5	25.8			26.4	5.99	8.33	25.85	6.48	25.85	8.38	25.85	8.07	25.85	12.68	25.85	8.78	25.85
3.68	25.85	1.28	25.85	1.8	25.85	1.55	25.85	4.81	25.85	1.32	25.85			26.45	4.18	8.29	25.9	6.6	25.9	9.39	25.9	8.93	25.9	13.32	25.9	9	25.9
3.03	25.9	2.09	25.9	6.09	25.9	1.46	25.9	4.03	25.9	1.18	25.9			26.5	2.54	8.14	25.95	6.68	25.95	9.75	25.95	9.24	25.95	7.42	25.95	10.67	25.95
2.17	25.95	1.37	25.95	5.36	25.95	1.74	25.95	2.79	25.95	1.26	25.95			26.55	1.5	8	26	6.68	26	9.17	26	9.94	26	10.72	26	9.89	26
2.05	26	1.84	26	4.19	26	5.08	26	1.7	26	1.32	26			26.6	1.21	7.87	26.05	6.67	26.05	9.37	26.05	10.89	26.05	10.91	26.05	8.45	26.05
1.35	26.05	1.75	26.05	2.41	26.05	5.55	26.05	2.02	26.05	1.11	26.05			26.65	1.14	8.04	26.1	6.54	26.1	9.25	26.1	10.26	26.1	10.55	26.1	8.14	26.1
1.24	26.1	1.13	26.1	3.09	26.1	3.65	26.1	1.88	26.1	1.12	26.1			26.7	3.85	8.5	26.15	6.73	26.15	9.38	26.15	10.41	26.15	9.38	26.15	8.12	26.15
1.29	26.15	1.11	26.15	1.53	26.15	2	26.15	1.71	26.15	1.25	26.15			26.75	2	9.35	26.2	7.63	26.2	9.36	26.2	9.98	26.2	8.54	26.2	8.17	26.2
1.6	26.2	1.15	26.2	1.16	26.2	1.56	26.2	1.29	26.2	1.29	26.2			26.8	1.96	9.19	26.25	8.33	26.25	9.15	26.25	8.97	26.25	7.99	26.25	8.22	26.25
1.49	26.25	1.38	26.25	1.1	26.25	1.79	26.25	1.32	26.25	1.18	26.25			26.85	3.17	8.31	26.3	9	26.3	8.8	26.3	8.15	26.3	7.88	26.3	8.46	26.3
1.4	26.3	1.24	26.3	3.47	26.3	1.49	26.3	1.41	26.3	1.79	26.3			26.9	1.56	7.74	26.35	9.7	26.35	9.21	26.35	7.75	26.35	8	26.35	8.85	26.35
3.24	26.35	1.3	26.35	2.53	26.35	1.76	26.35	1.42	26.35	2.29	26.35			26.95	1.31	7.36	26.4	10.81	26.4	10.47	26.4	7.36	26.4	8.08	26.4	10.03	26.4
5.23	26.4	1.65	26.4	1.44	26.4	2.98	26.4	2.62	26.4	1.8	26.4			27	1.85	7.09	26.45	9.73	26.45	10.02	26.45	6.85	26.45	8.16	26.45	10.7	26.45
2.31	26.45	1.53	26.45	1.42	26.45	2.51	26.45	1.96	26.45	1.25	26.45			27.05	2.29	7.23	26.5	9.58	26.5	8.66	26.5	6.71	26.5	8.17	26.5	10.72	26.5
1.49	26.5	1.58	26.5	1.6	26.5	2.9	26.5	1.22	26.5	1.4	26.5			27.1	5.7	8.05	26.55	11.13	26.55	8.19	26.55	6.8	26.55	8.19	26.55	9.71	26.55
1.76	26.55	1.45	26.55	1.92	26.55	1.87	26.55	1.26	26.55	1.43	26.55			27.15	3.8	5.77	26.6	12.02	26.6	8.32	26.6	7.36	26.6	8.13	26.6	9.28	26.6
1.49	26.6	1.02	26.6	1.81	26.6	1.39	26.6	1.22	26.6	1.07	26.6			27.2	3.66	4.89	26.65	11.37	26.65	9.39	26.65	8.02	26.65	8.01	26.65	8.32	26.65
1.51	26.65	1.15	26.65	1.38	26.65	1.43	26.65	1.25	26.65	1.19	26.65			27.25	3.95	3.51	26.7	9.53	26.7	10.88	26.7	7.91	26.7	7.88	26.7	7.64	26.7
1.37	26.7	1.14	26.7	1.71	26.7	1.69	26.7	1.32	26.7	1.86	26.7			27.3	1.93	3.38	26.75	7.95	26.75	10.23	26.75	8.13	26.75	7.67	26.75	7.26	26.75
2.22	26.75	1.29	26.75	2.1	26.75	1.48	26.75	1.45	26.75	1.94	26.75			27.35	1.32	7.87	26.8	7.28	26.8	9.23	26.8	8.91	26.8	7.62	26.8	7.36	26.8
2.51	26.8	1.43	26.8	1.89	26.8	1.53	26.8	1.32	26.8	1.19	26.8			27.4	1.38	7.82	26.85	7.09	26.85	9.28	26.85	9.72	26.85	7.63	26.85	7.34	26.85
1.78	26.85	1.18	26.85	1.94	26.85	1.65	26.85	1.29	26.85	1.09	26.85			27.45	1.61	8.02	26.9	7.09	26.9	9.31	26.9	10.82	26.9	7.63	26.9	7.34	26.9
2.06	26.9	1.26	26.9	4.43	26.9	1.47	26.9	1.54	26.9	1.14	26.9			27.5	2.21	8.59	26.95	7.13	26.95	9.12	26.95	11.6	26.95	7.8	26.95	7.39	26.95
1.34	26.95	1.59	26.95	3.63	26.95	1.51	26.95	3.29	26.95	1.08	26.95			27.55	2.48	9.18	27	7.04	27	10.34	27	10.59	27	8.08	27	7.56	27
1.37	27	1.59	27	2.16	27	1.55	27	4.06	27	1.07	27			27.6	1.67	8.93	27.05	7.3	27.05	10.9	27.05	9.44	27.05	7.97	27.05	7.66	27.05
1.85	27.05	2.91	27.05	1.3	27.05	1.62	27.05	2.47	27.05	1.01	27.05			27.65	4.45	7.66	27.1	7.91	27.1	11.5	27.1	8.29	27.1	8.19	27.1	8.16	27.1
1.31	27.1	3.7	27.1	1.33	27.1	2.47	27.1	3.59	27.1	1.34	27.1			27.7	6.72	7.35	27.15	8.57	27.15	11.44	27.15	7.93	27.15	8.71	27.15	8.82	27.15
1.41	27.15	7.58	27.15	1.63	27.15	3.24	27.15	3.56	27.15	1.3	27.15			27.75	5.28	7.63	27.2	9.05	27.2	11.23	27.2	7.63	27.2	9.78	27.2	9.66	27.2
2.1	27.2	8.82	27.2	1.68	27.2	4.7	27.2	2.66	27.2	1.23	27.2			27.8	4.95	7.73	27.25	9.35	27.25	10.25	27.25	7.77	27.25	10.61	27.25	9.68	27.25
1.54	27.25	6.65	27.25	1.72	27.25	6.71	27.25	3.11	27.25	1.33	27.25			27.85	5.31	7.68	27.3	9.99	27.3	9.65	27.3	8.57	27.3	9.93	27.3	9.28	27.3
1.55	27.3	5.23	27.3	3.82	27.3	3.69	27.3	5.65	27.3	1.53	27.3			27.9	5.31	7.36	27.35	10.57	27.35	9.89	27.35	9.06	27.35	8.37	27.35	8.32	27.35
1.47	27.35	5.65	27.35	2.83	27.35	2.87	27.35	4.27	27.35	1.08	27.35			27.95	3.82	7.49	27.4	9.95	27.4	10.12	27.4	9.89	27.4	8.06	27.4	7.8	27.4
4.11	27.4	6.55	27.4	2.96	27.4	3.93	27.4	5.8	27.4	1.36	27.4			28	1.74	7.5	27.45	8.22	27.45	10.07	27.45	9.59	27.45	8.88	27.45	7.86	27.45
10.04	27.45	7.37	27.45	4.77	27.45	5.76	27.45	4.98	27.45	4.16	27.45			28.05	3.19	8	27.5	7.97	27.5	9.83	27.5	10.2	27.5	8.77	27.5	8.37	27.5
6.98	27.5	6.94	27.5	3.32	27.5	5.63	27.5	3.29	27.5	3.76	27.5			28.1	2.66	8.56	27.55	8.74	27.55	9.59	27.55	9.35	27.55	7.85	27.55	9.23	27.55
5.85	27.55	5.47	27.55	3.53	27.55	3.66	27.55	2.59	27.55	7.82	27.55			28.15	2.69	8.42	27.6	8.53	27.6	10.09	27.6	9.16	27.6	7.37	27.6	9.97	27.6
4.36	27.6	4.24	27.6	2.95	27.6	2.61	27.6	2.28	27.6	8.76	27.6			28.2	2.28	8.22	27.65	3.07	27.65	10.12	27.65	9.29	27.65	7.16	27.65	9.92	27.65
4.51	27.65	3.13	27.65	2.94	27.65	1.81	27.65	2.24	27.65	6.04	27.65			28.25	1.52	9.26	27.7	7.94	27.7	9.61	27.7	9.45	27.7	7.22	27.7	10.22	27.7
3.45	27.7	3.63	27.7	2.4	27.7	3.56	27.7	2.99	27.7	4.64	27.7			28.3	1.52	9.79	27.75	7.92	27.75	9.18	27.75	10.1	27.75	8.04	27.75	11.28	27.75
8.14	27.75	2.74	27.75	2.18	27.75	3.72	27.75	4.51	27.75	3.96	27.75			28.35	1.75	10.32	27.8	8.35	27.8	9.56	27.8	11.2	27.8	8.84	27.8	11.36	27.8
9.54	27.8	2.28	27.8	2.01	27.8	3.09	27.8	3.3	27.8	3.31	27.8			28.4	1.8	9.15	27.85	9.8	27.85	10.03	27.85	11.2	27.85	8.24	27.85	10.85	27.85
7.29	27.85	1.64	27.85	1.8	27.85	3.98	27.85	3.22	27.85	4.59	27.85			28.45	1.96	8.56	27.9	10.46	27.9	9.93	27.9	9.58	27.9	8.05	27.9	9.61	27.9
6.73	27.9	1.42	27.9	4.39	27.9	11.05	27.9	5.31	27.9	3.5	27.9			28.5	1.94	6.95	27.95	9.2	27.95	10.93	27.95	8.58	27.95	8.03	27.95	9.77	27.95
6.66	27.95	1.38	27.95	4.4	27.95	14.51	27.95	4.99	27.95	2.49	27.95			28.55	1.58	5.97	28	8.3	28	11.25	28	8.33	28	8.09	28	11.28	28
3.77	28	1.33	28	3.29	28	9.67	28	4.7	28	1.75	28			28.6	1.4	5.99	28.05	8.46	28.05	9.06	28.05	8.59	28.05	7.97	28.05	10.46	28.05
2.02	28.05	2.04	28.05	3.38	28.05	5.05	28.05	4.12	28.05	2.79	28.05			28.65	1.92	6.22	28.1	8.22	28.1	8.89	28.1	9.33	28.1	8.06	28.1	11.12	28.1
5.25	28.1	1.72	28.1	3.51	28.1	2.03	28.1	7.17	28.1	2.03	28.1			28.7	1.54	7.34	28.15	10.32	28.15	10.74	28.15	8.88	28.15	8.18	28.15	10.45	28.15
7.82	28.15	1.61	28.15	2.55	28.15	2.59	28.15	6.24	28.15	2.41	28.15			28.75	1.8	8.41	28.2	12.2	28.2	9.67	28.2	7.12	28.2	8.51	28.2	9.64	28.2
6.72	28.2	1.32	28.2	2.22	28.2	2.14	28.2	4.89	28.2	2.53	28.2			28.8	1.53	9.35	28.25	13.56	28.25	9.21	28.25	6.39	28.25	8.91	28.25	9.84	28.25
4.28	28.25	1.47	28.25	1.59	28.25	1.95	28.25	6.46	28.25	2.3	28.25			28.85	2.25	9.86	28.3	14.42	28.3	9.4	28.3	6.88	28.3	8.77	28.3	10.48	28.3
4.61	28.3	1.43	28.3	1.95	28.3	2.27	28.3	2.7	28.3	1.22	28.3			28.9	1.39	9.64	28.35	13.54	28.35	10.17	28.35	8.12	28.35	8.82	28.35	11.84	28.35
8.07	28.35	1.29	28.35	2.87	28.35	3.68	28.35	3.68	28.35	1.16	28.35			28.95	1.83	9.4	28.4	12.12	28.4	11.4	28.4	7.29	28.4	9.92	28.4	13.1	28.4
8.6	28.4	1.2	28.4	2.45	28.4	3.97	28.4	3.57	28.4	1.03	28.4			29	1.4	9.38	28.45	11.08	28.45	11.52	28.45	6.43	28.45	11.04	28.45	13.34	28.45
7.81	28.45	1.18	28.45	1.76	28.45	3.28	28.45	2.1	28.45	1	28.45			29.05	1.44	9.54	28.5	9.85	28.5	10.78	28.5	6.13	28.5	12.01	28.5	14.45	28.5
1.84	28.5	1.21	28.5	1.39	28.5	4.45	28.5	3.69	28.5	1.04	28.5			29.1	1.36	9.73	28.55	9.64	28.55	10.09	28.55	6.51	28.55	11.35	28.55	15.65	28.55
2.31	28.55	2.42	28.55	1.36	28.55	6.11	28.55	2.29	28.55	1.26	28.55			29.15	1.36	9.95	28.6	9.95	28.6	9.4	28.6	9.24	28.6	9.94	28.6	15.44	28.6
2.73	28.6	3.88	28.6	1.52	28.6	4.1	28.6	1.32	28.6	4.46	28.6			29.2	1.49	10.43	28.65	10.97	28.65	9.2	28.65	11.93	28.65	9.51	28.65	14.03	28.65
4.41	28.65	1.25	28.65	1.19	28.65	2.68	28.65	1.77	28.65	3.65	28.65			29.25	1.32	10.66	28.7	13.02	28.7	10.06	28.7	11.99	28.7	9.55	28.7	13.59	28.7
3.11	28.7	1.15	28.7	1.11	28.7	3.46	28.7	2.31	28.7	1.97	28.7			29.3	1.25	10.96	28.75	14.25	28.75	10.01	28.75	11.46	28.75	10.03	28.75	13.6	28.75
1.78	28.75	1.18	28.75	1.49	28.75	2.02	28.75	2.86	28.75	1.07	28.75			29.35	1.23	10.94	28.8	15.42	28.8	9.65	28.8	10.54	28.8	10.54	28.8	12.09	28.8
3.95	28.8	1.27	28.8	1.67	28.8	1.41	28.8	1.88	28.8	1.49	28.8			29.4	2.15	10.67	28.85	14.91	28.85	9.15	28.85	9.54	28.85	11.52	28.85	10.77	28.85
4.47	28.85	1.19	28.85	1.54	28.85	1.52	28.85	2.15	28.85	2.23	28.85			29.45	4.44	12.68	28.9	14.14	28.9	10.37	28.9	9.54	28.9	13.35	28.9	10.74	28.9
2.26	28.9	1.26	28.9	1.49	28.9	2.27	28.9	2.28	28.9	2.27	28.9			29.5	3.74	15.06	28.95	13.36	28.95	12.84	28.95	10.28	28.95	13.91	28.95	11.35	28.95
1.8	28.95	1.49	28.95	1.77	28.95	3.08	28.95	2.22	28.95	2.38	28.95			29.55	2.63	16.37	29	13.63	29	16.79	29	11.34	29	13.01	29	11.61	29
2.16	29	1.43	29	1.34	29	2.8	29	1.43	29	1.89	29			29.6	2	16.83	29.05	15.11	29.05	18.18	29.05	11.6	29.05	10.1	29.05	11.67	29.05
3.79	29.05	1.45	29.05	1.81	29.05	2.42	29.05	3.38	29.05	1.93	29.05			29.65	1.28	15.25	29.1	15.86	29.1	20.27	29.1	12.46	29.1	12.43	29.1	12.7	29.1
3.35	29.1	1.38	29.1	1.72	29.1	4.84	29.1	2.16	29.1	1.87	29.1			29.7	1.33	12.4	29.15	15.26	29.15	20.34	29.15	12.65	29.15	12.63	29.15	11.48	29.15
4.97	29.15	1.33	29.15	1.26	29.15	5.01	29.15	2.05	29.15	1.28	29.15			29.75	1.36	10.15	29.2	13.89	29.2	18.84	29.2	13.4	29.2	13.32	29.2	10.06	29.2
3.96	29.2	1.59	29.2	2.96	29.2	5.59	29.2	1.6	29.2	1.33	29.2			29.8	1.22	9.35	29.25	12.84	29.25	16.29	29.25	14.06	29.25	13.97	29.25	9.51	29.25
2.52	29.25	1.8	29.25	3.21	29.25	3.68	29.25	2.9	29.25	1.92	29.25			29.85	1.28	9.52	29.3	12.54	29.3	12.77	29.3	12.45	29.3	14.27	29.3	9.15	29.3
3.02	29.3	1.42	29.3	3.92	29.3	2.26	29.3	7.61	29.3	1.23	29.3			29.9	1.36	10.13	29.35	12.08	29.35	10.9	29.35	10.05	29.35	13.45	29.35	9.21	29.35
1.38	29.35	1.37	29.35	4.68	29.35	2.94	29.35	7.7	29.35	1.16	29.35			29.95	1.4	10.49	29.4	10.54	29.4	11.17	29.4	9.39	29.4	11.48	29.4	9	29.4
1.28	29.4	1.91	29.4	3.96	29.4	4.8	29.4	5.37	29.4	1.26	29.4			30	1.33	11.88	29.45	10.19	29.45	11.94	29.45	9.53	29.45	10.08	29.45	9.16	29.45
1.23	29.45	1.4	29.45	3.18	29.45	2.74	29.45	4.6	29.45	1.37	29.45			30.05	1.37	13.84	29.5	10.3	29.5	14.08	29.5	10.22	29.5	9.08	29.5	9.07	29.5
1.19	29.5	1.33	29.5	2.47	29.5	7.12	29.5	3.45	29.5	1.7	29.5			30.1	1.42	15.81	29.55	10.78	29.55	14.63	29.55	11.64	29.55	8.31	29.55	8.88	29.55
1.25	29.55	1.51	29.55	1.94	29.55	8.79	29.55	1.52	29.55	1.27	29.55			30.15	1.54	15.96	29.6	11.88	29.6	15.21	29.6	11.73	29.6	7.9	29.6	8.71	29.6
1.34	29.6	1.29	29.6	1.22	29.6	5.92	29.6	1.2	29.6	1.37	29.6			30.2	1.48	14.91	29.65	13.7	29.65	15.37	29.65	10.4	29.65	7.86	29.65	8.8	29.65
1.62	29.65	1.17	29.65	1.04	29.65	5.68	29.65	1.19	29.65	1.63	29.65			30.25	1.83	13.97	29.7	11.01	29.7	15.14	29.7	9.84	29.7	7.83	29.7	9.11	29.7
2.08	29.7	1.52	29.7	1.17	29.7	4.7	29.7	1.25	29.7	1.35	29.7			30.3	1.44	13.73	29.75	15.74	29.75	14.69	29.75	10.14	29.75	7.77	29.75	9.77	29.75
1.75	29.75	1.36	29.75	1.2	29.75	1.72	29.75	1.29	29.75	1.48	29.75			30.35	1.72	14.09	29.8	16.66	29.8	13.14	29.8	11.26	29.8	7.71	29.8	9.79	29.8
5.23	29.8	1.41	29.8	1.2	29.8	1.33	29.8	1.2	29.8	1.33	29.8			30.4	2.42	14.64	29.85	16.73	29.85	11.29	29.85	13.42	29.85	7.63	29.85	9.69	29.85
7.23	29.85	1.56	29.85	1.64	29.85	1.44	29.85	1.27	29.85	1.64	29.85			30.45	2.41	15.86	29.9	15.63	29.9	8.55	29.9	15.43	29.9	7.56	29.9	11.12	29.9
6.37	29.9	1.47	29.9	1.31	29.9	1.35	29.9	1.25	29.9	1.14	29.9			30.5	1.76	14.95	29.95	14.95	29.95	7.71	29.95	17.06	29.95	7.66	29.95	12.82	29.95
3.57	29.95	1.52	29.95	1.24	29.95	1.33	29.95	1.24	29.95	1.43	29.95			30.55	1.46	13.75	30	15.3	30	9.45	30	17.46	30	8.13	30	13.91	30
1.92	30	1.28	30	1.31	30	1.34	30	1.31	30	1.13	30			30.6	1.46	13.41	30.05	16.14	30.05	10.61	30.05	17.16	30.05	10.2	30.05	16.26	30.05
1.27	30.1	1.22	30.05	1.26	30.05	1.37	30.05	1.14	30.05	1.22	30.05			30.65	2.16	14.27	30.1	17.56	30.1	11.92	30.1	15.84	30.1	12.81	30.1	16.89	30.1
1.25	30.15	1.63	30.1	1.17	30.1	1.39	30.1	1.26	30.1	1.17	30.1			30.7	1.4	15.07	30.15	17.74	30.15	14.32	30.15	12.95	30.15	14.1	30.15	15.2	30.15
1.31	30.2	1.35	30.15	1.1	30.15	1.55	30.15	1.39	30.15	1.24	30.15			30.75	1.61	14.42	30.2	19.44	30.2	16.52	30.2	11.55	30.2	15.44	30.2	13.76	30.2
1.3	30.25	1.33	30.2	1.3	30.2	1.42	30.2	2.33	30.2	1.15	30.2			30.8	1.49	12.47	30.25	20.98	30.25	17.87	30.25	12.06	30.25	16.73	30.25	13.15	30.25
1.29	30.3	1.33	30.25	1.5	30.25	1.38	30.25	2.47	30.25	1.19	30.25			30.85	1.49	10.6	30.3	19.94	30.3	17.19	30.3	13.2	30.3	17.23	30.3	12.66	30.3
1.29	30.35	1.32	30.3	1.58	30.3	1.42	30.3	2.21	30.3	1.18	30.3			30.9	1.75	9.89	30.35	18.24	30.35	13.64	30.35	14.34	30.35	14.38	30.35	12.44	30.35
1.29	30.4	1.78	30.35	1.26	30.35	1.41	30.35	1.6	30.35	1.69	30.35			30.95	3.18	10.01	30.4	19.16	30.4	12.4	30.4	15.46	30.4	11.14	30.4	12.33	30.4
1.28	30.45	1.88	30.4	1.24	30.4	1.39	30.4	1.44	30.4	1.26	30.4			31	2.33	10.58	30.45	20.8	30.45	12.69	30.45	15.97	30.45	9.84	30.45	13.15	30.45
1.37	30.5	1.31	30.45	1.39	30.45	1.94	30.45	1.61	30.45	1.63	30.45			31.05	2	11.4	30.5	19.66	30.5	12.83	30.5	14.92	30.5	9.35	30.5	14.09	30.5
1.41	30.55	1.3	30.5	2.09	30.5	1.65	30.5	1.34	30.5	1.33	30.5			31.1	2.32	12.18	30.55	17.67	30.55	11.25	30.55	14.15	30.55	9.31	30.55	15.21	30.55
1.34	30.6	1.39	30.55	1.9	30.55	1.5	30.55	1.55	30.55	2.64	30.55			31.15	1.35	9.82	30.6	17.02	30.6	10.72	30.6	12.86	30.6	9.33	30.6	16.15	30.6
1.27	30.65	1.43	30.6	1.5	30.6	1.7	30.6	3.14	30.6	2.31	30.6			31.2	1.4	13.49	30.65	14.91	30.65	11.19	30.65	11.77	30.65	9.72	30.65	15.76	30.65
1.29	30.7	1.38	30.65	1.57	30.65	1.66	30.65	3.86	30.65	1.38	30.65			31.25	1.57	13.72	30.7	8.68	30.7	11.94	30.7	11.79	30.7	10.25	30.7	13.91	30.7
1.6	30.75	1.36	30.7	1.29	30.7	1.51	30.7	3.95	30.7	1.94	30.7			31.3	1.32	13.77	30.75	11.69	30.75	13.39	30.75	12.68	30.75	10.86	30.75	12.57	30.75
1.36	30.8	1.56	30.75	1.17	30.75	1.75	30.75	3.16	30.75	1.49	30.75			31.35	1.37	14.15	30.8	10.26	30.8	15.19	30.8	13.08	30.8	11.99	30.8	12.47	30.8
1.37	30.85	1.37	30.8	1.48	30.8	1.75	30.8	1.91	30.8	2.19	30.8			31.4	1.59	14.47	30.85	9.49	30.85	16.59	30.85	13.34	30.85	14.45	30.85	13.11	30.85
1.26	30.9	1.5	30.85	1.3	30.85	1.5	30.85	2.4	30.85	2.24	30.85			31.45	2.19	15.16	30.9	9.31	30.9	16.04	30.9	13.81	30.9	16.61	30.9	14.36	30.9
1.66	30.95	1.68	30.9	1.27	30.9	1.48	30.9	1.55	30.9	1.37	30.9			31.5	1.57	2.19	30.95	9.29	30.95	14.01	30.95	14.25	30.95	18.55	30.95	15.5	30.95
2.23	31	1.54	30.95	1.33	30.95	1.54	30.95	1.39	30.95	1.21	30.95			31.55	2.6	16.27	31	10.01	31	11.6	31	15.11	31	18.63	31	17.1	31
1.28	31.05	1.36	31	1.25	31	1.57	31	1.66	31	1.19	31			31.6	2.32	17.05	31.05	11.94	31.05	10.62	31.05	15.12	31.05	14.75	31.05	17.4	31.05
1.61	31.1	2.74	31.05	1.43	31.05	2.05	31.05	1.34	31.05	2.51	31.05			31.65	1.63	17.23	31.1	12.77	31.1	10.1	31.1	15.26	31.1	16.78	31.1	15.96	31.1
1.62	31.15	2.92	31.1	1.7	31.1	3.88	31.1	1.39	31.1	4.11	31.1			31.7	2.42	16.26	31.15	15.27	31.15	10.18	31.15	13.39	31.15	15.4	31.15	15.8	31.15
1.97	31.2	2.25	31.15	1.7	31.15	3.5	31.15	1.3	31.15	4.29	31.15			31.75	1.8	14.42	31.2	17.59	31.2	10.65	31.2	12.06	31.2	14.28	31.2	15.94	31.2
2.21	31.25	1.81	31.2	1.39	31.2	2.09	31.2	1.29	31.2	3.06	31.2			31.8	1.49	12.94	31.25	17.27	31.25	10.98	31.25	12.03	31.25	12.14	31.25	15.95	31.25
1.42	31.3	1.68	31.25	2.03	31.25	1.66	31.25	1.33	31.25	1.32	31.25			31.85	2.07	12.3	31.3	14.91	31.3	10.83	31.3	12.96	31.3	9.95	31.3	16.51	31.3
1.44	31.35	2.21	31.3	1.33	31.3	1.66	31.3	1.28	31.3	1.58	31.3			31.9	2.03	12.7	31.35	13	31.35	11.91	31.35	14.18	31.35	9.15	31.35	16.26	31.35
1.43	31.4	1.65	31.35	2.38	31.35	1.5	31.35	1.33	31.35	3.23	31.35			31.95	2.57	13.87	31.4	11.25	31.4	12.09	31.4	15.08	31.4	9.13	31.4	13.27	31.4
1.3	31.45	1.83	31.4	1.41	31.4	1.6	31.4	1.35	31.4	1.65	31.4			32	2.32	13.7	31.45	11.11	31.45	11.44	31.45	16.35	31.45	8.72	31.45	10.94	31.45
1.31	31.5	2.06	31.45	1.31	31.45	1.61	31.45	1.32	31.45	1.27	31.45			32.05	2.76	11.2	31.5	12.88	31.5	12	31.5	15.54	31.5	8.7	31.5	10.08	31.5
1.31	31.55	2.4	31.5	2.09	31.5	1.52	31.5	1.33	31.5	1.31	31.5			32.1	1.42	10.1	31.55	15.58	31.55	13.43	31.55	13.28	31.55	9.25	31.55	9.83	31.55
1.68	31.6	2.16	31.55	1.74	31.55	1.58	31.55	1.47	31.55	1.35	31.55			32.15	1.32	9.93	31.6	18.11	31.6	15.31	31.6	13.01	31.6	9.87	31.6	9.82	31.6
1.76	31.65	1.44	31.6	1.36	31.6	1.57	31.6	1.34	31.6	1.37	31.6			32.2	1.33	7.84	31.7	16.31	31.65	15.97	31.65	14.19	31.65	10.22	31.65	10.08	31.65
1.37	31.7	1.79	31.65	1.32	31.65	1.58	31.65	1.37	31.65	1.37	31.65			32.25	1.4	11.04	31.75	15.17	31.7	16.09	31.7	13.94	31.7	10.7	31.7	10.22	31.7
1.36	31.75	1.54	31.7	1.28	31.7	1.56	31.7	1.76	31.7	1.41	31.7			32.3	1.41	11.97	31.8	13.96	31.75	15.74	31.75	14.25	31.75	11.54	31.75	10.8	31.75
1.37	31.8	1.85	31.75	1.31	31.75	4.85	31.75	1.47	31.75	1.45	31.75			32.35	1.8	11.61	31.85	13.58	31.8	16.28	31.8	13.37	31.8	13.58	31.8	11.89	31.8
1.53	31.85	2.4	31.8	1.26	31.8	5.25	31.8	1.35	31.8	1.38	31.8			32.4	1.46	11.53	31.9	13.6	31.85	15.67	31.85	10.72	31.85	15.5	31.85	14.98	31.85
1.42	31.9	1.69	31.85	1.25	31.85	5.5	31.85	1.36	31.85	1.35	31.85			32.45	1.58	10.03	31.95	13.15	31.9	14.26	31.9	10.57	31.9	16.32	31.9	17.61	31.9
2.09	31.95	1.69	31.9	1.25	31.9	6.21	31.9	1.37	31.9	1.47	31.9			32.5	1.72	11.77	32	12.65	31.95	14.23	31.95	12.21	31.95	16.02	31.95	18.47	31.95
3.31	32	1.9	31.95	1.24	31.95	5.93	31.95	1.63	31.95	1.31	31.95			32.55	1.9	11.82	32.05	12.54	32	16.15	32	14.54	32	15.4	32	17.55	32
1.85	32.05	2.24	32	1.26	32	3.64	32	3.08	32	1.3	32			32.6	1.25	12.1	32.1	11.91	32.05	17.13	32.05	14.21	32.05	14.97	32.05	16.49	32.05
2.21	32.1	2.58	32.05	1.87	32.05	2.73	32.05	3.03	32.05	0.7	32.05			32.65	1.22	12.85	32.15	14.45	32.1	16.57	32.1	13.16	32.1	16.34	32.1	14.13	32.1
1.85	32.15	2.46	32.1	2.08	32.1	2.48	32.1	1.54	32.1	0.33	32.1			32.7	1.38	13.57	32.2	14.85	32.15	17.48	32.15	12.36	32.15	17.05	32.15	11.55	32.15
1.41	32.2	1.94	32.15	2.94	32.15	6.77	32.15	1.51	32.15	0.33	32.15			32.75	1.34	13.93	32.25	15.4	32.2	16.85	32.2	12.52	32.2	15.36	32.2	9.98	32.2
1.32	32.25	4.24	32.2	2.05	32.2	7.32	32.2	2.28	32.2	0.33	32.2			32.8	1.36	12.78	32.3	13.57	32.25	13.89	32.25	13.04	32.25	14.42	32.25	9.19	32.25
1.31	32.3	3.31	32.25	2.2	32.25	4.33	32.25	1.51	32.25	0.33	32.25			32.85	1.33	12.88	32.35	13.14	32.3	11.04	32.3	12.77	32.3	14.8	32.3	8.78	32.3
1.29	32.35	1.78	32.3	1.74	32.3	2.05	32.3	1.53	32.3	1.25	32.3			32.9	1.29	14.16	32.4	13.85	32.35	9.93	32.35	12.01	32.35	15.48	32.35	9.19	32.35
1.31	32.4	1.57	32.35	1.99	32.35	1.59	32.35	1.57	32.35	2.74	32.35			32.95	1.28	16.42	32.45	14.81	32.4	10.11	32.4	11.86	32.4	16.34	32.4	9.15	32.4
1.32	32.45	1.54	32.4	2.32	32.4	1.59	32.4	2.88	32.4	5.31	32.4			33	1.22	17.77	32.5	16.03	32.45	11.76	32.45	12.74	32.45	17.09	32.45	10.07	32.45
1.32	32.5	1.44	32.45	1.54	32.45	1.56	32.45	6.45	32.45	4.12	32.45			33.05	1.27	18.03	32.55	16.96	32.5	13.53	32.5	14.58	32.5	17.36	32.5	13.73	32.5
1.3	32.55	1.83	32.5	3.42	32.5	1.51	32.5	7.96	32.5	3.08	32.5			33.1	2.74	18.15	32.6	16.62	32.55	14.06	32.55	15.02	32.55	15.36	32.55	13.74	32.55
1.91	32.6	2.25	32.55	4.07	32.55	1.75	32.55	9.28	32.55	2.21	32.55			33.15	4.15	16.57	32.65	16.08	32.6	14.75	32.6	16.17	32.6	13.85	32.6	12.57	32.6
1.54	32.65	1.43	32.6	2.8	32.6	1.57	32.6	9.2	32.6	3.79	32.6			33.2	2.83	13.15	32.7	16.72	32.65	14.39	32.65	16.43	32.65	14.28	32.65	11.26	32.65
1.65	32.7	1.46	32.65	2.03	32.65	2.09	32.65	8.23	32.65	2.9	32.65			33.25	1.57	11.47	32.75	16.73	32.7	11.64	32.7	16	32.7	15.38	32.7	9.79	32.7
1.41	32.75	1.37	32.7	2.08	32.7	2.38	32.7	4.34	32.7	2.27	32.7			33.3	2.54	11.4	32.8	15.83	32.75	9.94	32.75	15.85	32.75	17.34	32.75	8.73	32.75
1.39	32.8	1.49	32.75	2.89	32.75	2.85	32.75	2.38	32.75	3.75	32.75			33.35	2.21	12.63	32.85	14.14	32.8	9.63	32.8	16.2	32.8	16.92	32.8	9.31	32.8
1.84	32.85	1.44	32.8	3.63	32.8	3.02	32.8	1.65	32.8	5.42	32.8			33.4	1.46	14.17	32.9	11.87	32.85	10.01	32.85	15.33	32.85	14.88	32.85	10.02	32.85
1.77	32.9	1.5	32.85	2.59	32.85	2.51	32.85	1.87	32.85	6.06	32.85			33.45	1.48	14.16	32.95	9.24	32.9	10.35	32.9	14.86	32.9	14.49	32.9	10.09	32.9
4.36	32.95	1.46	32.9	1.95	32.9	1.81	32.9	2.32	32.9	5.07	32.9			33.5	1.32	13.19	33	8.46	32.95	10.6	32.95	14.49	32.95	15.08	32.95	10.27	32.95
4.64	33	1.39	32.95	2.16	32.95	1.71	32.95	5	32.95	2.43	32.95			33.55	1.34	10.85	33.05	8.8	33	11.1	33	14.76	33	14.15	33	10.94	33
1.4	33.05	1.33	33	1.57	33	1.58	33	3.53	33	1.35	33			33.6	1.44	10.37	33.1	10.4	33.05	11.53	33.05	14.74	33.05	12.96	33.05	11.26	33.05
1.3	33.1	3.8	33.05	2.13	33.05	--		3.88	33.05	1.76	33.05			33.65	1.53	10.44	33.15	10.54	33.1	13.55	33.1	14.88	33.1	13.24	33.1	11.89	33.1
2.92	33.15	4.86	33.1	2.2	33.1	--		5.19	33.1	1.68	33.1			33.7	1.38	11.39	33.2	10.1	33.15	15.89	33.15	15.35	33.15	16.18	33.15	12.49	33.15
3.43	33.2	4.01	33.15	1.59	33.15	--		5.07	33.15	1.95	33.15			33.75	1.43	12.99	33.25	9.93	33.2	14.51	33.2	14.11	33.2	16.72	33.2	12.71	33.2
3.5	33.25	2.43	33.2	1.44	33.2	--		4.43	33.2	3.54	33.2			33.8	1.61	15.9	33.3	9.83	33.25	12.28	33.25	12.27	33.25	16.38	33.25	14.57	33.25
2.84	33.3	2.03	33.25	1.5	33.25	--		2.33	33.25	2.82	33.25			33.85	1.82	15.24	33.35	9.83	33.3	11.87	33.3	12.31	33.3	15.36	33.3	16.18	33.3
1.76	33.35	1.99	33.3	1.5	33.3	--		2.45	33.3	1.61	33.3			33.9	1.71	13.21	33.4	10.28	33.35	12.16	33.35	14.2	33.35	14.45	33.35	15.93	33.35
1.68	33.4	2.37	33.35	1.95	33.35	--		1.43	33.35	1.44	33.35			33.95	2.67	12.41	33.45	10.78	33.4	12.26	33.4	17.98	33.4	13.73	33.4	16.37	33.4
1.33	33.45	1.85	33.4	1.6	33.4		--	1.37	33.4	1.41	33.4			34	2.11	12.14	33.5	11.84	33.45	12.4	33.45	19.54	33.45	14.58	33.45	13.94	33.45
1.7	33.5	1.68	33.45	1.52	33.45		--	1.36	33.45	2.21	33.45			34.05	2.11	13.3	33.55	12.87	33.5	12.63	33.5	17.29	33.5	16.84	33.5	11.33	33.5
2.35	33.55	1.75	33.5	1.58	33.5		--	1.58	33.5	3.15	33.5			34.1	2.64	14.5	33.6	12.31	33.55	12.9	33.55	15.12	33.55	17.16	33.55	10.09	33.55
1.72	33.6	2.05	33.55	1.4	33.55		--	2.04	33.55	2.38	33.55			34.15	1.51	14.82	33.65	11.52	33.6	11.98	33.6	15.28	33.6	16.33	33.6	9.46	33.6
2.43	33.65	2.78	33.6	1.32	33.6		--	1.53	33.6	1.52	33.6			34.2	1.55	15.36	33.7	11.36	33.65	11.06	33.65	14.45	33.65	16.79	33.65	9	33.65
2.52	33.7	2.55	33.65	1.32	33.65		--	1.82	33.65	1.37	33.65			34.25	2.51	13.83	33.75	11.7	33.7	10.11	33.7	14.25	33.7	17.05	33.7	8.67	33.7
2.57	33.75	2.02	33.7	1.31	33.7		--	4	33.7	1.35	33.7			34.3	2.8	12.34	33.8	12.74	33.75	11.17	33.75	15.03	33.75	15.43	33.75	8.6	33.75
1.72	33.8	1.8	33.75	1.5	33.75		--	4.17	33.75	1.33	33.75			34.35	2.5	11.92	33.85	13.36	33.8	13.72	33.8	15.34	33.8	17.1	33.8	8.55	33.8
1.33	33.85	1.78	33.8	1.82	33.8		--	5.55	33.8	1.57	33.8			34.4	2.8	11.81	33.9	12.91	33.85	16.14	33.85	14.46	33.85	16.17	33.85	8.32	33.85
1.73	33.9	1.83	33.85	2.39	33.85		--	3.61	33.85	2.57	33.85			34.45	1.58	12.19	33.95	11.86	33.9	17.38	33.9	13.95	33.9	15.99	33.9	8.88	33.9
3.19	33.95	1.54	33.9	1.57	33.9		--	3.05	33.9	4.79	33.9			34.5	1.49	13.04	34	11.79	33.95	17.06	33.95	16.65	33.95	17.21	33.95	10.76	33.95
4.78	34	1.58	33.95	1.46	33.95			7.1	33.95	2.14	33.95			34.55	1.59	13.99	34.05	12.14	34	16.22	34	16.95	34	18.74	34	14.14	34
3.1	34.05	1.48	34	1.85	34			7.75	34	2.2	34			34.6	2.57	15.25	34.1	13.08	34.05	15.75	34.05	15.1	34.05	18.98	34.05	15.27	34.05
1.42	34.1	0.91	34.05	2.14	34.05			8.36	34.05	4.57	34.05			34.65	1.4	14.44	34.15	13.5	34.1	16.22	34.1	14.73	34.1	19.67	34.1	16.72	34.1
1.33	34.15	1.62	34.1	2.05	34.1			8.15	34.1	5.47	34.1			34.7	3.34	13.37	34.2	13.44	34.15	15.55	34.15	14.89	34.15	17.92	34.15	14.87	34.15
1.35	34.2	1.69	34.15	2.67	34.15			7.6	34.15	5.76	34.15			34.75	2.8	13.66	34.25	13.68	34.2	13.57	34.2	16.58	34.2	15.5	34.2	13.41	34.2
1.39	34.25	1.58	34.2	3.08	34.2			7.28	34.2	5.65	34.2			34.8	2.65	12.89	34.3	11.59	34.25	14.39	34.25	17.73	34.25	15.15	34.25	13.27	34.25
1.38	34.3	1.43	34.25	2.59	34.25			7.54	34.25	5.57	34.25			34.85	3.14	12.65	34.35	10.75	34.3	16.21	34.3	17.48	34.3	17.91	34.3	14.61	34.3
1.39	34.35	1.42	34.3	2.11	34.3			9.48	34.3	5.55	34.3			34.9	2.68	13.51	34.4	10.79	34.35	16.93	34.35	18.48	34.35	18.48	34.35	14.04	34.35
1.45	34.4	1.47	34.35	4.49	34.35			9.72	34.35	5.57	34.35			34.95	2.34	14.54	34.45	11.9	34.4	16.16	34.4	19.73	34.4	18	34.4	11.86	34.4
2.53	34.45	1.46	34.4	2.8	34.4			6.52	34.4	4.98	34.4			35	2.33	14.03	34.5	13.65	34.45	15.84	34.45	18.44	34.45	18.33	34.45	10.96	34.45
3.1	34.5	1.57	34.45	2.37	34.45			5.6	34.45	4.75	34.45			35.05	2.82	12.34	34.55	15.66	34.5	13.5	34.5	17.97	34.5	17.63	34.5	11.38	34.5
5.05	34.55	1.57	34.5	2.23	34.5			3.88	34.5	5.33	34.5			35.1	2.25	11.96	34.6	18.16	34.55	12.39	34.55	16.54	34.55	17.4	34.55	12.63	34.55
4.23	34.6	1.52	34.55	1.72	34.55			4.01	34.55	7.1	34.55			35.15	1.8	12.39	34.65	19.41	34.6	12.58	34.6	17.37	34.6	18.21	34.6	13.19	34.6
3.85	34.65	1.45	34.6	1.67	34.6			7.65	34.6	8.15	34.6			35.2	1.85	13.14	34.7	18.49	34.65	13.3	34.65	17.54	34.65	16.98	34.65	12.05	34.65
4.11	34.7	1.49	34.65	2.44	34.65			8.9	34.65	8.67	34.65			35.25	2.76	13.36	34.75	18.01	34.7	13.74	34.7	14.69	34.7	14.72	34.7	11.39	34.7
2.77	34.75	1.5	34.7	1.93	34.7			9.31	34.7	9.12	34.7			35.3	2.03	11.72	34.8	18.12	34.75	14.15	34.75	12.76	34.75	13.54	34.75	14.5	34.75
2.31	34.8	1.67	34.75	1.43	34.75			9.8	34.75	9.24	34.75			35.35	1.53	11.55	34.85	17.41	34.8	13.68	34.8	12.2	34.8	12.74	34.8	17.29	34.8
3.03	34.85	1.75	34.8	1.93	34.8			9.97	34.8	8.8	34.8			35.4	1.66	12.25	34.9	16.82	34.85	13.27	34.85	12.19	34.85	12.39	34.85	17.17	34.85
2.91	34.9	1.62	34.85	3.73	34.85			9.77	34.85	8.79	34.85			35.45	1.55	13.82	34.95	14.77	34.9	13.67	34.9	12.3	34.9	12.3	34.9	14.44	34.9
4.5	34.95	1.5	34.9	3.45	34.9			11.56	34.9	10.08	34.9			35.5	2.32	15.24	35	13.61	34.95	12.22	34.95	12.85	34.95	12.82	34.95	13.27	34.95
4.53	35	1.49	34.95	2.52	34.95			12.39	34.95	10.08	34.95			35.55	2.83	10.62	35.05	13.51	35	12.98	35	14.18	35	13.82	35	11.35	35
4.72	35.05	1.64	35	1.67	35			12.39	35	9.47	35			35.6	1.82	13.58	35.1	12.05	35.05	13.79	35.05	14.08	35.05	13.64	35.05	10.57	35.05
6.23	35.1	1.79	35.05	1.03	35.05			12.11	35.05	8.39	35.05			35.65	1.6	14.33	35.15	11.03	35.1	14.55	35.1	18.41	35.1	14.86	35.1	10.61	35.1
4.33	35.15	1.68	35.1	1.79	35.1			11.61	35.1	7.84	35.1			35.7	1.63	14.21	35.2	7.78	35.15	13.12	35.15	19.95	35.15	15.08	35.15	11.57	35.15
2.93	35.2	1.38	35.15	1.65	35.15			12.3	35.15	6.89	35.15			35.75	1.77	11.2	35.25	4.32	35.2	11.97	35.2	19.8	35.2	15.64	35.2	11.03	35.2
8.27	35.25	1.39	35.2	1.37	35.2			12.91	35.2	9.35	35.2			35.8	2.11	7.37	35.3	3.61	35.25	11.7	35.25	19.96	35.25	18.02	35.25	7.92	35.25
11.64	35.3	1.88	35.25	1.81	35.25			12.84	35.25	10.53	35.25			35.85	2.1	4.93	35.35	3.94	35.3	13.21	35.3	19.22	35.3	20.87	35.3	10.9	35.3
11.83	35.35	1.88	35.3	1.82	35.3			11.82	35.3	9.96	35.3			35.9	3.29	4.32	35.4	2.87	35.35	15.14	35.35	15.41	35.35	21.24	35.35	12.09	35.35
11.8	35.4	1.83	35.35	2.35	35.35			10.55	35.35	9.6	35.35			35.95	8.16	3.49	35.45	3.15	35.4	14.03	35.4	12.5	35.4	20.14	35.4	11.27	35.4
12.38	35.45	1.66	35.4	2.16	35.4			9.2	35.4	9.47	35.4			36	7.61	2.51	35.5	8.44	35.45	11.89	35.45	11.12	35.45	17.2	35.45	11.58	35.45
15.35	35.5	1.9	35.45	2.19	35.45			8.6	35.45	9.34	35.45				--	4.95	35.55	9.49	35.5	11	35.5	10.7	35.5	14.96	35.5	12.4	35.5
17.96	35.55	4.23	35.5	6.3	35.5			9.5	35.5	8.85	35.5				--	3.56	35.6	10.03	35.55	7.9	35.55	11.05	35.55	16.61	35.55	11.53	35.55
18.71	35.6	3.63	35.55	6.21	35.55			10.87	35.55	8.1	35.55				--	2.29	35.65	9.9	35.6	4.17	35.6	12.06	35.6	16.99	35.6	11.01	35.6
18.58	35.65	1.74	35.6	4.69	35.6			10.13	35.6	7.28	35.6				--	4.33	35.7	10.4	35.65	3.83	35.65	10.88	35.65	13.83	35.65	11.53	35.65
17.93	35.7	2.12	35.65	2.67	35.65			9.68	35.65	6.18	35.65				--	9.81	35.75	10.55	35.7	8.9	35.7	6.05	35.7	12.28	35.7	12.83	35.7
16.81	35.75	2.37	35.7	2.32	35.7			9.79	35.7	4.18	35.7				--	11.23	35.8	10.53	35.75	9.67	35.75	4.88	35.75	12.02	35.75	13.89	35.75
17.07	35.8	2.18	35.75	1.77	35.75			10.13	35.75	2.5	35.75				--	13.37	35.85	11.38	35.8	10.37	35.8	2.81	35.8	11.16	35.8	14.89	35.8
15.88	35.85	1.92	35.8	2.26	35.8			10.53	35.8	3.05	35.8			--	--	12.47	35.9	9.94	35.85	12.74	35.85	3.25	35.85	10.5	35.85	13.58	35.85
15.63	35.9	1.55	35.85	1.33	35.85			10.26	35.85	5.23	35.85			--	--	10.6	35.95	7.94	35.9	14.09	35.9	3.79	35.9	10.44	35.9	12.87	35.9
16.13	35.95	1.56	35.9	--				9.68	35.9	4.99	35.9			--	--	8.81	36	7.12	35.95	12.05	35.95	3.2	35.95	10.62	35.95	13.9	35.95
16.52	36	1.47	35.95	--				9.43	35.95	6.66	35.95			--	--	8.02	36.05	8.56	36	10.17	36	2.51	36	11.06	36	14.05	36
15.6	36.05	1.51	36	--				8.65	36	13.01	36			--	--	7.6	36.1	6.14	36.05	9.56	36.05	2.2	36.05	12.45	36.05	13.21	36.05
15.34	36.1	1.08	36.05	--				--		--	--			--	--	7.52	36.15	5.03	36.1	9.54	36.1	2.93	36.1	14.09	36.1	11.91	36.1
15.09	36.15	1.54	36.1	--				--		--	--			--	--	7.16	36.2	4.31	36.15	9.9	36.15	4.85	36.15	14.12	36.15	11.55	36.15
14.35	36.2	1.58	36.15	--				--		--	--			--	--	7.96	36.25	3.14	36.2	9.77	36.2	8.19	36.2	11.66	36.2	10.52	36.2
13.1	36.25	1.55	36.2	--				--		--	--			--	--	8.47	36.3	2.42	36.25	7.92	36.25	8.87	36.25	11.34	36.25	8.88	36.25
13.34	36.3	1.56	36.25	--				--		--	--			--	--	7.84	36.35	2.22	36.3	7.1	36.3	9.2	36.3	9.75	36.3	5.54	36.3
15.24	36.35	1.54	36.3					--		--	--			--	--	4.51	36.4	3.12	36.35	7.68	36.35	10.19	36.35	9.09	36.35	4.04	36.35
16.17	36.4	1.54	36.35					--		--	--			--	--	3.3	36.45	2.91	36.4	8.07	36.4	10.4	36.4	9.19	36.4	4.83	36.4
16.97	36.45	1.74	36.4					--		--	--			--	--	3.73	36.5	2.89	36.45	7.29	36.45	10.25	36.45	8.58	36.45	6.5	36.45
17.15	36.5	2.47	36.45	--					--		--			--	--	5.48	36.55	7.79	36.5	8.34	36.5	9.89	36.5	8.61	36.5	7.4	36.5
--		2.27	36.5						--		--			--	--	4.26	36.6	5.92	36.55	9.16	36.55	8.27	36.55	8.93	36.55	10.75	36.55
--		1.71	36.55						--		--			--	--	3.55	36.65	9.44	36.6	8.19	36.6	7.97	36.6	9.15	36.6	14.79	36.6
--		1.7	36.6						--		--			--	--	2.39	36.7	9.86	36.65	4.22	36.65	6.83	36.65	8.94	36.65	15.35	36.65
--		1.92	36.65						--		--			--	--	2.87	36.75	8.09	36.7	2.5	36.7	3.87	36.7	9.37	36.7	15.38	36.7
--		1.9	36.7		--				--		--			--	--	2.74	36.8	8.61	36.75	2.02	36.75	2.77	36.75	9.53	36.75	15.22	36.75
--		2.95	36.75		--				--		--			--	--	3	36.85	8.78	36.8	2.91	36.8	2.65	36.8	9.72	36.8	14.61	36.8
--		3.71	36.8		--				--		--			--	--	3.01	36.9	9.83	36.85	2.86	36.85	3	36.85	11.15	36.85	12.66	36.85
--		8.27	36.85		--				--		--			--	--	2.7	36.95	11.03	36.9	4.56	36.9	2.78	36.9	11.4	36.9	10.09	36.9
	--	6.22	36.9		--				--		--			--	--	5.02	37	10.56	36.95	3.74	36.95	2.91	36.95	10.86	36.95	8.87	36.95
	--	2.89	36.95		--				--		--			--	--	5.68	37.05	10.55	37	3.02	37	6.84	37	10.97	37	8.75	37
	--	2.33	37		--				--		--			--	--	7.05	37.1	11.34	37.05	3.44	37.05	5.89	37.05	11.34	37.05	8.74	37.05
		1.37	37.05													9.36	37.15	10.77	37.1	2.71	37.1	8.61	37.1	14.57	37.1	9.39	37.1
		2.16	37.1													8.14	37.2	9.88	37.15	3.15	37.15	9.15	37.15	13.8	37.15	10.58	37.15
		1.97	37.15													8.13	37.25	11.57	37.2	3.29	37.2	9.36	37.2	12.36	37.2	11.46	37.2
		5.55	37.2													10.57	37.3	12.58	37.25	2.97	37.25	9.97	37.25	11.55	37.25	11.99	37.25
		19.57	37.25													11.54	37.35	13.53	37.3	5.14	37.3	9.81	37.3	10.97	37.3	10.77	37.3
		--	--													11.75	37.4	14.33	37.35	8.16	37.35	8.84	37.35	11	37.35	11.63	37.35
		--	--													10.92	37.45	14.15	37.4	7.61	37.4	7.33	37.4	11.21	37.4	12.56	37.4
		--														10.1	37.5	13.76	37.45	6.17	37.45	7.21	37.45	10.75	37.45	12.96	37.45
		--														10.74	37.55	13.74	37.5	8.09	37.5	8.76	37.5	11.7	37.5	12.99	37.5
		--														11.16	37.6	14.81	37.55	8.49	37.55	8.37	37.55	13.09	37.55	11.58	37.55
		--														11.03	37.65	14.15	37.6	10.79	37.6	6.79	37.6	13.42	37.6	10.99	37.6
		--														10.57	37.7	12.9	37.65	10.43	37.65	6.14	37.65	14.1	37.65	12.03	37.65
		--														10.45	37.75	12.67	37.7	9.64	37.7	6.15	37.7	14.31	37.7	12.53	37.7
		--														11.36	37.8	13.32	37.75	9.15	37.75	7.89	37.75	13.51	37.75	12.63	37.75
		--														11.36	37.85	14.22	37.8	9.33	37.8	9.83	37.8	12.21	37.8	11.85	37.8
			--													11.31	37.9	4.68	37.85	9.21	37.85	10.82	37.85	11.36	37.85	12.33	37.85
			--													11.56	37.95	13.4	37.9	8.8	37.9	9.71	37.9	10.6	37.9	12.32	37.9
			--													12.58	38	11.33	37.95	8.52	37.95	9.21	37.95	10.62	37.95	10.73	37.95
			--													12.26	38.05	9.56	38	8.31	38	9.49	38	11.66	38	10.15	38
			--													11.48	38.1	8.99	38.05	9.05	38.05	7.34	38.05	12.04	38.05	10.18	38.05
			--													12.08	38.15	11.17	38.1	10.6	38.1	9.25	38.1	11.84	38.1	11.11	38.1
			--													12.11	38.2	12.66	38.15	10.81	38.15	8.68	38.15	11.09	38.15	11.14	38.15
			--													11.49	38.25	12.89	38.2	10.92	38.2	8.27	38.2	11.79	38.2	11.09	38.2
			--													10.85	38.3	13.96	38.25	9.91	38.25	8.27	38.25	12.7	38.25	11.95	38.25
			--													11.58	38.35	15.87	38.3	9.33	38.3	9.47	38.3	12.44	38.3	11.87	38.3
			--													13.51	38.4	16.53	38.35	9.15	38.35	10.79	38.35	11.72	38.35	12.89	38.35
			--													13.63	38.45	17	38.4	9.9	38.4	12.13	38.4	11.07	38.4	14.66	38.4
			--													12.43	38.5	17.77	38.45	11.66	38.45	13.26	38.45	10.53	38.45	13.57	38.45
			--													11.72	38.55	18.87	38.5	11.87	38.5	12.59	38.5	10.24	38.5	12.18	38.5
			--													12.38	38.6	18.29	38.55	10.51	38.55	12.09	38.55	9.92	38.55	12.81	38.55
			--													12.36	38.65	18.99	38.6	9.68	38.6	12.71	38.6	9.66	38.6	11.91	38.6
																11.6	38.7	18.61	38.65	10.05	38.65	14.14	38.65	9.32	38.65	9.67	38.65
																10.4	38.75	17.98	38.7	11.51	38.7	14.94	38.7	9.15	38.7	6.92	38.7
																13.12	38.8	17.35	38.75	11.1	38.75	14.83	38.75	8.82	38.75	4.46	38.75
																15.09	38.85	16.04	38.8	10.06	38.8	16.18	38.8	8.64	38.8	4.83	38.8
																15.35	38.9	16.86	38.85	10.29	38.85	18.96	38.85	9.07	38.85	11.17	38.85
																15.41	38.95	16.71	38.9	11.93	38.9	21.28	38.9	9.21	38.9	12.6	38.9
																15.77	39	15.41	38.95	14.54	38.95	18.59	38.95	9.14	38.95	12.39	38.95
																15.52	39.05	15.78	39	16.34	39	16.56	39	9.6	39	11.93	39
																16.2	39.1	15.89	39.05	16.14	39.05	15.57	39.1	9.86	39.05	12.66	39.05
																14.85	39.15	15.89	39.1	15.73	39.1	16.38	39.15	10.3	39.1	13.89	39.1
																14.71	39.2	15.27	39.15	15.45	39.15	16.3	39.2	10.96	39.15	13.86	39.15
																16	39.25	15.23	39.2	14.52	39.2	14.98	39.25	11.52	39.2	12.6	39.2
																15.06	39.3	15.02	39.25	13.98	39.25	15.32	39.3	12.72	39.25	12.52	39.25
																13.74	39.35	14.59	39.3	14.54	39.3	16.55	39.35	12.79	39.3	14.44	39.3
																13.34	39.4	14.84	39.35	14.97	39.35	17.96	39.4	11.84	39.35	14.56	39.35
																15.13	39.45	15.64	39.4	14.07	39.4	20.2	39.45	11.4	39.4	13.68	39.4
																15.89	39.5	14.45	39.45	12.93	39.45	19.86	39.5	11.15	39.45	13.06	39.45
																15.76	39.55	14.79	39.5	11.49	39.5	19.92	39.55	10.62	39.5
																16.07	39.6	16.41	39.55	10.01	39.55	18.26	39.6	9.88	39.55
																16.7	39.65	16.62	39.6	11.68	39.6	17.42	39.65	8.96	39.6
																15.66	39.7	15.36	39.65	14.77	39.65	18.33	39.7	10.62	39.65
																14.79	39.75	15.35	39.7	14.29	39.7	21.09	39.75	12.19	39.7
																12.13	39.8	15.23	39.75	13	39.75	19.46	39.8	11.61	39.75
																9.46	39.85	14.83	39.8	13.39	39.8	17.98	39.85	10.95	39.8
																8.84	39.9	13.43	39.85			17.83	39.9
																6.38	39.95	12.63	39.9			18.64	39.95
																5.72	40	11.71	39.95			19.93	40				--
																		12.29	40			17.92	40.05				--
																		11.14	40.05								--
																											--
																											--
